1 **Article**

2

3 **Title:**

4 **COMPOSITUM 1 (COM1) contributes to the architectural simplification of**  
5 **barley inflorescence via meristem identity signals**

6

7 **Authors:**

8 N. Poursarebani<sup>1</sup>, C. Trautewig<sup>1</sup>, M. Melzer<sup>1</sup>, T. Nussbaumer<sup>3,4</sup>, U. Lundqvist<sup>5</sup>, T. Rutten<sup>1</sup>, T.  
9 Schmutzer<sup>1,2</sup>, R. Brandt<sup>1</sup>, A. Himmelbach<sup>1</sup>, L. Altschmied<sup>1</sup>, R. Koppolu<sup>1</sup>, H. M. Youssef<sup>1,2,6</sup>, R.  
10 Sibout<sup>7,8</sup>, M. Dalmais<sup>9</sup>, A. Bendahmane<sup>9</sup>, N. Stein<sup>1</sup>, Z. Xin<sup>10</sup>, T. Schnurbusch<sup>1,2</sup>

11

12 **Affiliations:**

13 <sup>1</sup>Leibniz Institute of Plant Genetics and Crop Plant Research (IPK), Corrensstr. 3 OT Gatersleben,  
14 D-06466 Seeland, Germany

15 <sup>2</sup>Martin Luther University Halle-Wittenberg, Faculty of Natural Sciences III, Institute of  
16 Agricultural and Nutritional Sciences, 06120 Halle, Germany

17 <sup>3</sup>Technical University of Munich and Helmholtz Center Munich, Institute of Environmental  
18 Medicine, UNIKA-T, Neusäßer Str. 47, 86156 Augsburg, Germany

19 <sup>4</sup>Helmholtz Zentrum München (HMGU), German Research Center for Environmental Health,  
20 Institute of Network Biology (INET), 85764 Neuherberg, Germany

21 <sup>5</sup> Nordic Genetic Resource Center (NordGen), Smedjevägen 3, Box P.O. 41, SE-230 53 Alnarp,  
22 Sweden

23 <sup>6</sup>Faculty of Agriculture, Cairo University, Giza, Egypt

24 <sup>7</sup> Institut Jean-Pierre Bourgin, INRAE, AgroParisTech, Université Paris-Saclay, 78000,  
25 Versailles, France

26 <sup>8</sup> INRAE, UR BIA, F-44316, Nantes, France

27 <sup>9</sup> INRAE, CNRS, Institute of Plant Sciences Paris-Saclay IPS2, Univ Paris Sud, Univ Evry, Univ  
28 Paris-Diderot, Sorbonne Paris-Cité, Université Paris-Saclay, 91405 Orsay, France

29 <sup>10</sup> USDA-ARS, Plant Stress and Germplasm Development Unit, Cropping Systems Research  
30 Laboratory, Lubbock, TX 79415, USA

31  
32 \*Corresponding authors. Email: Poursarebani@ipk-gatersleben.de (NP); Schnurbusch@ipk-  
33 gatersleben.de (TS)

34

35

36

37

38

39

40

41 **Main Text:**

42

43 **Abstract:**

44 Grasses have varying inflorescence shapes; however, little is known about the genetic mechanisms  
45 specifying such shapes among tribes. We identified the grass-specific TCP transcription factor  
46 COMPOSITUM 1 (COM1) expressed in inflorescence meristematic boundaries of different  
47 grasses. COM1 specifies branch-inhibition in Triticeae (barley) versus branch-formation in non-  
48 Triticeae grasses. Analyses of cell size, cell walls and transcripts revealed barley COM1 regulates  
49 cell growth, affecting cell wall properties and signaling specifically in meristematic boundaries to  
50 establish identity of adjacent meristems. *COM1* acts upstream of the boundary gene *Liguleless1*  
51 and confers meristem identity partially independent of the *COM2* pathway. Furthermore, COM1 is  
52 subject to purifying natural selection, thereby contributing to specification of the spike  
53 inflorescence shape. This meristem identity pathway has conceptual implications for both  
54 inflorescence evolution and molecular breeding in Triticeae.

55

56

57

58

59

60

61

## 62 **Introduction**

63 The grass family (Poaceae), one of the largest angiosperm families, has evolved a striking diversity  
64 of inflorescence morphologies bearing complex structures such as branches and specialized  
65 spikelets<sup>1</sup>. These structural features are key for sorting the grass family into tribes<sup>1</sup>. Current grass  
66 inflorescences are proposed to originate from a primitive ancestral shape exhibiting “a relatively  
67 small panicle-like branching system made up of primary and secondary paracladia (branches), each  
68 one standing single at the nodes”<sup>2</sup> (**Fig. 1A**). This ancestral panicle-like inflorescence is also  
69 known as a compound spike<sup>3-5</sup>. Several independent or combined diversification processes  
70 throughout the evolutionary history of the grass family have resulted in the broad diversity of  
71 today’s grass inflorescences<sup>2,3,6</sup>. Some tribes, e.g. Oryzeae (rice) and Andropogoneae (maize and  
72 sorghum), still display ancestral and complex compound shapes, keeping true-lateral long primary  
73 and secondary branches. Other grasses, such as *Brachypodium distachyon*, show lower  
74 inflorescence complexity with branch length and number reduced to lateral, small pedicels ending  
75 in only one multi-floretted spikelet (**Fig. 1A–C**). Inflorescences within the tribe Triticeae, e.g.  
76 barley (*Hordeum vulgare* L.), probably evolved from the ancestral compound spike into the typical  
77 unbranched spike (**Fig. 1D**). The spike displays the least-complex inflorescence shape due to the  
78 sessile nature of spikelets and reduction in rachis internodes<sup>2,7</sup>. Architectural variation is often  
79 manifested through subtle modifications of transcriptional programs during critical transitional  
80 windows of inflorescence meristem (IM) maturation<sup>7,8</sup> or functional divergence of key  
81 transcriptional regulators and/or other genes<sup>9,10</sup>. Identification of key genetic determinants is  
82 crucial for better understanding and explaining both the origin of grass inflorescence diversity and  
83 grass developmental gene evolution. Inflorescence developmental patterning controls pollination,  
84 grain set and grain number, and is thus highly relevant to agronomy as a target of natural and human  
85 selection.

86 A valuable toolkit to explore such genetic determinants regulating inflorescence patterns in  
87 Triticeae is a collection of morphological barley mutants, induced by physical and chemical  
88 mutagens <sup>11</sup>. This collection includes both compositum-barleys displaying branched spikes and  
89 their corresponding near isogenic lines (NIL) <sup>12</sup>. There are eight of such NILs reported <sup>12</sup> one of  
90 which, NIL *COMPOSITUM2* (*COM2*), has been characterized so far. The underlying gene encodes  
91 an AP2/ERF transcription factor orthologous to maize *BD1* with a conserved function of branch  
92 suppression across grass <sup>13</sup>. Here, we have conducted a detailed phenotypic inspection of another  
93 compositum-barley, NIL *COM1*, also displaying non-canonical, i.e. branched, spike morphology.  
94 We identified and characterized the underlying boundary forming protein, a grass-specific TCP  
95 transcription factor, and present evidence that *COM1* in barley has evolved a function opposite to  
96 its orthologous genes in maize and rice, *ZmBAD1/WABI* and *OsREP1/DBOP*, respectively <sup>14-17</sup>.  
97 We further show that its orthologous proteins also functions oppositely in sorghum and  
98 *Brachypodium distachyon*. Unlike in these non-Triticeae grasses, in which branch-formation is  
99 promoted, *COM1* inhibits spike-branching most likely by affecting meristematic signaling via  
100 changing cell wall properties of meristematic boundaries. We generated a double mutant (DM) of  
101 *com1.a/com2.g* and provide evidence that DM plants outperformed both single mutants as well as  
102 the control wild type plants in supernumerary spikelet formation, and as a consequence, in grain  
103 number per spike. Thus, our findings may spur further interests for grass inflorescence evolution  
104 but similarly for improving grain number.

105

106

107

108

109

## 110 **Results**

### 111 **Atypical for Triticeae—barley *com1.a* forms a branched inflorescence**

112 Barley (and other Triticeae) wild-type (Wt) spikes are typically unbranched and composed of  
113 sessile, single-flowered spikelets arranged in a regular distichous fashion of two opposite rows  
114 directly attached to the main inflorescence axis, i.e. rachis (**Fig. 1E**). In a mature barley spike, three  
115 spikelets per rachis node are visible. Each spikelet initiates from a single meristematic mound first  
116 detectable at the triple mound (TM) stage during early reproductive development (**Fig. 1F**). Thus,  
117 the TM corresponds to three spikelets meristems (SMs); one central (CSM) and two lateral (LSM)  
118 spikelet meristems. The differentiating primordia are followed by several consecutive meristematic  
119 and developmental stages e.g. glume primordium (GP; **Fig. 1G**), lemma primordium (LP; **Fig. 1H**),  
120 and stamen primordium (SP; **Fig. 1I-J**).<sup>18</sup>

121 To provide deeper insights into the genetic basis defining inflorescence architecture in Triticeae,  
122 we conducted a detailed phenotypic inspection of a NIL of compositum-barley (*com1.a*) mutant  
123 displaying an uncommon branched spike (**Fig. 1K**). The original *com1.a* branched spike mutant  
124 was first discovered after simultaneous mutagenesis using EMS and neutron radiation in *cv.* Foma.  
125 It was later backcrossed (BC<sub>6</sub>) to a two-rowed barley *cv.* Bowman (BW)<sup>12</sup> to create the  
126 aforementioned NIL, the BW-NIL(*com1.a*)(**Supplementary Fig. 1A-B**). Thus, we hereafter refer  
127 to the BW-NIL(*com1.a*), as *com1.a* mutant. The inflorescence in this *com1.a* mutant, resembles an  
128 ancestral compound spike (**Fig. 1K**), but lacks an organ called pulvinus (**Fig. 1N-O**). In non-  
129 Triticeae grass species, the pulvinus is present at the axil of lateral long branches in panicles and  
130 compound spikes, defining branch angle extent (**Fig. 1A-C**, in brown). We observed differences  
131 in spike shape between BW and *com1.a* during early spike differentiation at the late triple mound  
132 (TM) to early glume primordium (GP) stage; the mutant central spikelet meristem (SM) is  
133 elongated (**Fig. 1P** versus Wt in **1G**), becoming more apparent during later reproductive stages of

134 late glume primordium (**Fig. 1Q**) onwards (**Fig. 1R–S**). At LP, predominantly in the basal part of  
135 the spike, meristems of the central spikelet positions undergo evidently SM identity loss, displaying  
136 branch- or IM-like meristems (**Fig. 1R**). Instead of generating florets, the meristem continues to  
137 elongate and rather functions as an indeterminate spikelet multimer in the form of a primary branch-  
138 like structure (**Fig. 1T**). Such branch-like structures occasionally replace other spikelet-related  
139 organs, such as the rachilla primordium (RP, the spikelet axis, in **Fig. 1S**; the possible origin for  
140 extended rachilla visible at maturity; **Fig. 1L–M**) or glumes (**Fig. 1T** in purple). The *com1*  
141 branching phenotype resembles that of the previously described *com2*<sup>13</sup>, in which the formation  
142 of branch-like structures results from lack of SM identity (See below).

143

#### 144 ***COM1* restricts palea cell size by thickening their cell walls**

145 In barley, the grains are enclosed by two bract-like organs, i.e. lemma and palea, which are part of  
146 the floret and provide protection to the developing grain. (Fig. 1M). Besides the branch phenotype,  
147 *com1.a* exhibits a deviation in adaxial palea morphology, having a flat plane (**Fig. 1U**) versus the  
148 conventional distinct infolding observed in BW (**Fig. 1V**), *cv.* Foma, and wild barley (*H. vulgare*  
149 subsp. *spontaneum*). This deviation was visible in all paleae independent of their position along  
150 the spike. Histological analyses using cross sections of paleae middle-areas (**Fig. 1U**) revealed  
151 distinct features of *com1.a* in which sclerenchymatous cells, in particular, appeared to be expanded  
152 in size and most likely also in numbers (**Fig. 1W–X**); however, we did not determine cell numbers  
153 quantitatively. Cell expansion is thought to be tightly linked to cell wall extensibility<sup>19,20</sup>. We used  
154 transmission electron microscopy (TEM) to verify whether *com1.a* palea cells had altered cell wall  
155 features. Notably, mutant palea cells had clearly thinner cell wall structures, thus fewer mechanical  
156 obstructions for cell expansion, implicating that *COM1* functions as a regulator of cell growth via  
157 cell wall modifications (**Fig. 1Y–Z and Supplementary Fig. 2**). Moreover, mutant paleae

158 generally formed three vascular bundles (VB) (**Fig. 1W**) compared with two VBs in BW (**Fig. 1X**).  
159 By analogy to changes in palea cell walls, such alterations might also explain the rescission of SM  
160 identity, providing that COM1 similarly affects cell wall integrity in meristematic cells, e.g. SM  
161 cells or boundary cells (cells separating inflorescence meristem, IM, from SMs) (see below).

162

### 163 **COM1 encodes a class II, subclass CYC/TB1 TCP transcription factor**

164 To investigate the genetic basis of the *com1.a* phenotype, we constructed a genetic map by  
165 screening ~6,000 gametes for recombination events in an F<sub>2</sub> population (Bowman × *com1.a*)  
166 followed by further analysis of F<sub>3</sub> families. Thus, 15 critical recombinant F<sub>2</sub>-derived F<sub>3</sub> families  
167 (i.e., 16 plants per family) were further analyzed (**Supplementary Table 1, 2 and 3**;  
168 **Supplementary Fig. 1C–F**). This delimited a ~1.4 Mb interval carrying eight genes, one of which  
169 is a predicted transcription factor (HORVU 5Hr1G061270) entirely absent in *com1.a*, likely due to  
170 an induced deletion (**Fig. 2A**). The remaining seven genes either were not expressed or not  
171 differentially regulated between Wt and *com1.a* mutant (see below, the transcriptome analysis).

172 To validate our candidate gene, we sequenced it in a set of 20 induced barley spike-branching  
173 mutants and in a barley TILLING population of two-rowed barley cv. Barke. Resequencing of  
174 branching mutants, using both CDS and promoter specific primer pairs (**Supplementary Table 1**),  
175 revealed that five of them, i.e. *Mut.3906*, *int-h.42*, *int-h.43* and *int-h.44*, and *com1.j*, lost the same  
176 transcription factor as was found missing in the *com1.a* mutant (**Fig. 3**; **Supplementary Table 4**).

177 All five mutants also showed the flat-palea phenotype observed in the mutant *com1.a* (**Fig. 3**).  
178 Allelism tests of *com1.a* with *Mut.3906* indicated that they are allelic to each other. Furthermore,  
179 PCR-screening of the TILLING populations for the CDS of the candidate gene revealed four  
180 homozygous M3 plants (M3.15104, M3.4406, M3.13729 and M3.2598) carrying SNP mutations  
181 inside the DNA binding domain (**Fig. 2B**). Additionally, two heterozygous M3 lines M3.4063 and



182 M3.9299 with SNP mutation outside the domain were also identified (**Fig. 2B**). All six SNP  
183 mutations caused amino acid substitution in conserved positions (**Fig. 2B**). They all transmitted a  
184 branched spike as was revealed by the phenotypes of the corresponding M4 and M5 homozygous  
185 plants (**Fig. 4; Supplementary Figs. 3 and 4; Supplementary Table 4**). Interestingly, from the  
186 six TILLING mutants, only two, with mutation within the TCP domain, showed either a true flat-  
187 palea phenotype with a complete loss of the infolding (line 2598, exhibiting also the most severe  
188 branching), or only a mild change in the palea shape (line 4406) (**Fig. 2B; Fig. 4**). Thus, penetrance  
189 of the mutant flat-palea phenotype depended on the type and position of the amino acid substitution  
190 (**Supplementary Fig. 3**, legend). Together, these data confirmed unambiguously that the  
191 transcriptional regulator was responsible for the spike-branching and palea phenotypes in *com1.a*.  
192 Annotation analysis of the COM1 protein showed that it belongs to the plant-specific TCP  
193 (Teosinte branched 1 (TB1)/Cycloidea/Proliferating Cell Factor) transcription factor family;  
194 COM1 contains 273 amino acids and features one basic helix-loop-helix TCP domain (**Fig. 2B**).  
195 Proteins of the TCP family fall into two classes, with COM1 belonging to class II, subclass  
196 CYC/TB1<sup>21,22</sup>.

197

### 198 **Barley COM1 function evolved to affect boundary signaling**

199 We next asked whether COM1 has experienced functional conservation or divergence within the  
200 grasses and whether its sequence composition supports possible functional alteration. We used the  
201 comprehensive phylogenetic analyses available for grass TCPs<sup>22,23</sup> (and the references therein) as  
202 a starting point for our own COM1-specific phylogenetic analyses. We searched for homologs and  
203 paralogs of COM1 in sequenced grass genomes, including rice, maize, sorghum, hexaploid wheat  
204 and *Brachypodium distachyon*, as well as *Arabidopsis thaliana* (**Fig. 2C**). The homolog of maize  
205 TB1, obtained from the aforementioned grasses, was added as an out-group to the phylogeny. Our

206 sequence searches and the phylogenetic analysis confirmed that COM1 is restricted to grasses (**Fig.**  
207 **2C**) as reported previously<sup>14,15,24</sup>. The homologs of COM1 in maize and rice were reported  
208 previously as *ZmBAD1/WABI* and *OsREP1/DBOP* (60.3% and 65.5% sequence similarity to  
209 COM1), respectively<sup>14-17</sup>. Except for maize, none of the COM1 homologs showed a duplication  
210 after speciation (e.g. no in-paralogs resulting from within-genome duplication,<sup>25</sup>). Furthermore,  
211 COM1 seems to be a paralog (e.g. out-paralog<sup>25</sup> that refers to duplication before speciation; see  
212 **Supplementary Fig. 5A–B**) of the sorghum gene *SbMSD1* (44.1% sequence similarity to COM1)  
213<sup>26</sup>. Functional characterization of COM1 homologs is only available for maize and rice (Table 1)  
214<sup>14,15,17</sup>.

215 Maize *BAD1/WABI* transcripts are mainly detected at the IM-to-BM (branch meristem) boundary  
216 region as well as between pulvinus and lateral branches (in Fig. 3J of<sup>15</sup>). Consequently, loss-of-  
217 function *bad1/wab1* mutants display organ fusion (a known boundary formation defect) resulting  
218 in reduced branch number (from 5.8 in Wt to 1.3 in mutant siblings) and angle size, and more  
219 upright tassel branches<sup>14,15</sup>. This gene was dubbed a boundary formation gene promoting lateral  
220 meristem (e.g. branch) and axillary organ (e.g. pulvinus) formation in Wt maize<sup>14,15</sup>.

221 Our phylogenetic analysis identified orthologs of *COM1*, in both sorghum and *Brachypodium*  
222 *distachyon* (**Fig. 2C**). Thus, to further expand our knowledge about *COM1* function within non-  
223 Triticeae, we therefore studied these species using a TILLING approach. We first screened a  
224 TILLING population in sorghum originated from cv. BTx623. The sorghum Wt inflorescence, a  
225 panicle, consists of a main rachis on which many primary, secondary as well as sometimes tertiary  
226 branches develop (**Fig. 5A**). Similar to maize, sorghum plants possess a pulvinus to regulate branch  
227 angle. The TILLING analysis revealed one mutant (ARS180 line; A144T) with both upright  
228 panicle branches (10.95° in Wt vs. 5.2° in mutant,  $P \leq 0.001$ ; **Fig. 5A-G; Supplementary Table 5**)  
229 and reduced primary branch number per “node” e.g. whorls of branches (5.1 in Wt vs. 4.3 in mutant,

230  $P \leq 0.05$ ; **Supplementary Table 5**). Measurement of branch angle was used as a proxy for pulvinus  
231 development (**Supplementary Table 5**). These data suggest a similar positive role of sorghum  
232 *BADI/WABI* in pulvinus development and branch initiation/formation, revealing functional  
233 conservation of the protein between sorghum and maize. Moreover, we detected no obvious change  
234 in sorghum palea morphology except one additional vascular bundle, similar to maize and barley  
235 (**Table 1**).

236 The rice homolog of *COM1*, *OsREPI/DBOP*, shows a major effect in promoting palea identity,  
237 growth and development, with no effect on branch angle or branch initiation<sup>16,17</sup>. Loss-of-function  
238 mutants display smaller paleae due to less differentiation and severely reduced size of palea cells;  
239 a clear contrast to palea defects in barley (**Table 1**). Our TILLING analysis of *COM1* homologs in  
240 *Brachypodium distachyon* (for its Wt inflorescence shape see schematic **Fig. 1C** and **Fig. 5K**)  
241 identified several mutants. Phenotypic investigation of two lines (5446: Q116\* and 8373: S146N)  
242 (**Supplementary Table 4, Supplementary Note**) revealed similar phenotypes to the  
243 aforementioned non-Triticeae species (**Table 1**) (**Fig. 5H–P**). Similarly, we observed a palea defect  
244 (**Fig. 5H–I**) but histological analyses revealed no changes in cell expansion, except the formation  
245 of one additional vascular bundle in each mutant (**Fig. 5N–O**). We also observed a reduction in  
246 branch angle because of smaller or absent pulvini (**Fig. 5J–M**); however, the number of lateral  
247 branches was not altered in either *Brachypodium* mutants (**Fig. 5Q–S**). In conclusion, *COM1*  
248 homologs within non-Triticeae grasses primarily promote boundary formation and cell  
249 differentiation (as in rice palea)/proliferation (as seen for pulvinus) (**Table 1**); but similarly  
250 promote the formation of lateral axillary organs, e.g. branch or pulvinus, to contribute in  
251 maintaining complex inflorescence structures.

252 To better understand the contrasting *COM1* function of branch-inhibition in barley versus branch-  
253 formation in non-Triticeae grasses, we analyzed barley *COM1* expression using qRT-PCR and

254 semi-qPCR (Fig. 6A-C) followed by mRNA *in-situ* hybridization (**Fig. 6D-G**). Barley *COM1*  
255 transcripts were detected in paleae (**Fig. 6C, F-G**), VB of the rachis (Fig. 6E), and importantly at  
256 the base of forming SMs throughout the boundary region separating SMs from IM (IM-to-SM  
257 boundary) and between lateral and central SMs (**Fig. 6E-F**), similar to non-Triticeae grass species,  
258 e.g. maize. This expression pattern suggests involvement of barley *COM1* in specification of the  
259 spikelet meristematic boundary. However, since central and lateral spikelets do not fuse into each  
260 other or to the IM (as long branches do fuse to the IM in maize or sorghum), barley *COM1* may  
261 not be involved in boundary formation *per se* but perhaps rather in boundary signaling (see below  
262 transcriptional result and discussion).<sup>27</sup> Recently acquired protein motifs specific to Triticeae  
263 *COM1* may support this functional difference (**Fig. 2D** Motifs 7, 13, 15 and 17 **and**  
264 **Supplementary Fig. 6**).

265 We checked whether natural selection has acted upon barley *COM1* sequence composition and  
266 function, and consequently formation of unbranched spikes in barley. Re-sequencing of the barley  
267 *COM1* coding sequence in a panel of 146 diverse barley landraces and 90 wild barleys<sup>28,29</sup> revealed  
268 very little natural sequence variation (site diversity of  $\pi = 0.0006$ ). Eleven SNPs resulted in a  
269 simple 12-haplotype network (**Supplementary Fig. 7**) comprising only two main haplotypes,  
270 neither of the 12 showed mutant spike or palea phenotypes (**Supplementary Fig. 7**). This suggests  
271 that barley *COM1* underwent purifying natural selection. We assume that this selection may have  
272 contributed to maintaining barley's slimmed-down inflorescence shape.

273

#### 274 ***COM1* inhibits inflorescence branching partially independent to *COM2***

275 We had previously reported a branch suppressor gene, the AP2/ERF transcription factor *COM2*,  
276 with a conserved function across grass species<sup>13</sup>. *COM2* expresses in an arc-like region between  
277 central (CS) and lateral spikelets (LS) as well as between the SM and the emerging GP<sup>13</sup>. As the

278 *com1* phenotype resembles that of *com2* (**Fig. 7A-C**), we developed and characterized BW-  
279 NIL(*com1./com2.g*) double mutants (e.g. DM, or *com1./com2.g* double mutant) to study their  
280 interactions in regulating branch inhibition in barley.

281 We first performed a comparative SEM-based image analysis in immature spikes of the two singles  
282 and the DM mutants. As illustrated above, SEM of the two single mutants revealed similar  
283 branched phenotypes by generating a simple branch structure (SBS) in which the CSMs located at  
284 the more basal nodes lost identity and converted into IM-like branches (for a typical SBS see; **Fig.**  
285 **7B-C**). SBS also included homeotic transformations of glumes (**Fig. 7B-C**, in purple). In contrast,  
286 DM immature spikes revealed interesting observations including loss of identity and conversion of  
287 LSMs to IM-like branches, in addition to the loss of identity in CSMs (**Fig. 7D**). These conversions  
288 were observed in all nodes; not only in basal ones. Furthermore, glume primordia that underwent  
289 only an occasional homeotic transformation in basal nodes in single mutants (in purple, **Fig. 7B-**  
290 **C**), were also converted into IM-like meristems at all nodes of a DM spike (in purple, **Fig. 7D**).  
291 Therefore, a mixed meristematic re-organization per immature DM spike was observed  
292 representing a tentative ten-rowed barley spike (**Fig. 7D** and the legend), and thus, a rather complex  
293 branch structure (CBS).

294 To further characterize the three genotypic classes, i.e. DMs, *com1.a* and *com2.g*, we also  
295 compared spike morphology at maturity. A set of 20 plants per class as well as 20 wild type *cv.*  
296 Bowman plants were grown to perform a comparative phenotyping of mature spikes. Our visual  
297 inspection of the two single mutants at maturity revealed three types of spike forms including Wt  
298 (**Fig. 7E**), SBS (**Fig. 7F-G**; typical SBS branching forms) and CBS (**Fig. 7H**). In case of Wt  
299 inflorescence architecture, *com1.a* displayed only 3,7% of the spikes per family in this class, while  
300 *com2.g* showed a higher frequency of 22%. As expected, SBS was the most frequent class in both  
301 single mutant families with 91% and 73% of spikes per family in *com1.a* and *com2.g*, respectively.

302 Interestingly, both single mutants showed also a low level of CBS with similar frequency (*com1.a*;  
303 5,3%, *com2.g*; 5,1%) that was mostly visible in small late tillers. Thus, *com1.a* mutant showed a  
304 higher phenotypic penetrance for spike-branching, e.g. higher level of SBS and lower frequency of  
305 Wt spikes, as compared to *com2.g* mutant plants. In contrast to the single mutants, all (100%)  
306 spikes of the DMs displayed the CBS class (**Fig. 7H**), leading DM plants to outperform either  
307 single mutant in supernumerary spikelet formation, and thus, in grain number per spike (**Fig. 7I**).  
308 We further measured other grain-related characters (**Fig. 7J-N**), showing that the DMs had the  
309 lowest TKW; most likely due to the known trade-off with increased grain number.  
310 To further examine the genetic interactions between *COM1* and *COM2* during branch inhibition of  
311 the barley spike, we performed qRT-PCR analyses. *COM2* transcript levels in immature spikes of  
312 *com1.a* were unchanged during the two early stages tested; however, slightly lower expression was  
313 only found during later stages of development (**Fig. 7O and Fig8A**; dashed red arrow). Thus, the  
314 DM analyses imply that the two loci may act partially independently/additively during branch  
315 inhibition in barley.

316

### 317 **Putative transcriptional regulation during barley spike development**

318 To further examine the molecular basis of *COM1* branch inhibition within the barley spike, we  
319 performed qRT-PCR to locate *COM1* relative to other previously known spike architecture genes  
320 (**Fig. 8A**, black arrows). In addition to the interactions with *COM2* (Fig. 7O), we localized *COM1*  
321 downstream of *VRS4* (*HvRA2*; orthologous to maize *RAMOSA2*), the main regulator of row type  
322 and branch inhibition (**Supplementary Fig. 8A-D**)<sup>7,13</sup> using qRT-PCR analyses of *COM1*  
323 expression in the BW-NIL(*vrs4.k*) mutant (**Supplementary Fig. 8E and Fig. 8A**).

324 We performed comparative RNA-seq using mRNAs from immature spikes of BW and *com1.a* as  
325 well as the mutant progenitor, *cv. Foma*, when spike patterning begins to differ between genotypes,

326 plus two subsequent stages (**Figs. 1 and 8B; Online Materials**). Differentially expressed (DE)  
327 genes were identified in comparisons of *com1.a* versus BW and mutant versus *cv.* Foma. We found  
328 83 genes (Log<sub>2</sub> FoldChanges; LFC |  $\geq$  0.5; adjusted  $P < 0.05$ ) DE in at least one stage in both  
329 comparisons (**Fig. 8B; Supplementary Figs. 9–10; Supplementary Source Data**): 18 and 65 genes  
330 up- and downregulated in BW-NIL(*com1.a*), respectively.

331 Among significantly downregulated genes across all three stages (**Fig. 8B**), we detected one  
332 *SQUAMOSA PROMOTER-BINDING-LIKE 8* gene (*SPL8*, HORVU2Hr1G111620) homologous  
333 to the boundary gene *LIGULELESS 1* in maize (*LG1*; *ZmSPL4*), rice *OsLG1* (*OsSPL8*) and  
334 hexaploid wheat *TaLG1* (*TaSPL8*)<sup>30</sup>. Similar to the known maize module  
335 (*RA2* → *WABI/BADI* → *LG1*;<sup>14,15</sup>, we found that *VRS4/HvRA2* → *COM1* → *HvLG1* regulation  
336 appears to be maintained in barley. *HvLG1* mRNA *in-situ* hybridization showed co-localization  
337 with *COM1* in the base of the forming SMs throughout the boundary region separating SMs from  
338 IM (IM-to-SM boundary) (**Fig. 8C-D**). Transcriptome analysis of leaf tissues in a wheat *liguleless1*  
339 mutant revealed *TaSPL8* as a cell wall-related gene<sup>30</sup>. Notably, no spike-branching phenotype was  
340 reported for this erected-leaf *liguleless* mutant, most likely due to genetic redundancy.

341 Among other significantly downregulated genes in *com1.a*, we found important genes associated  
342 with cell wall properties and integrity (**Fig. 8B; Supplementary Fig. 9**). These include  
343 HORVU5Hr1G006430, a leucine-rich repeat receptor kinase (LRR-RLK), and  
344 HORVU3Hr1G030260 belonging to the cytochrome P450 superfamily. LRR-RLKs and CYP450s  
345 are involved in lignin deposition to cell walls upon cellulose biosynthesis inhibition and during  
346 lignin biosynthesis *per se*, respectively<sup>31,32</sup>. Other cell wall-related genes include two genes  
347 encoding xyloglucan endotransglucosylase/hydrolase (XTH) 25 (HORVU7Hr1G098280 and  
348 HORVU7Hr1G098260) and barley *Low Silicon Influx 1* (*HvLSII*; HORVU6Hr1G075850)<sup>33</sup>, both  
349 downregulated in the mutant. These cell wall-related genes may support *COM1* involvement in

350 regulation of cell wall mechanics of palea cells and the IM-to-SM boundary, and indirectly,  
351 putative signaling required for acquiring SM identity.

352

## 353 **Discussion**

354 Here we report that barley COM1 affects cell growth through regulation of cell wall properties  
355 specifically in palea and IM-to-SM boundary cells; the latter provide identity signals to barley  
356 SMs<sup>34</sup>. Signaling to the SM to establish its identity is a key genetic switch by which barley  
357 inflorescences acquire spike architecture, not seen in non-Triticeae grasses.

358 *COM1* is present only in grasses, with no true *Arabidopsis* ortholog; intriguingly, we observed  
359 functional differences of COM1 between barley and non-Triticeae grass species. The differences  
360 in COM1 function was clear by comparing mutant versus wild type inflorescence phenotypes  
361 across grass species, and was further elucidated by our analysis at the cellular/molecular level.  
362 At the phenotypic level, barley COM1 inhibits spike-branching to simplify floral architecture;  
363 whereas in non-Triticeae COM1 homologs promote formation of lateral branches (e.g. up to  
364 60% more branches in maize when compared to mutants<sup>15</sup>) to sustain the ancestral inflorescence  
365 complexity.

366 At the cellular level in non-Triticeae grasses, COM1 has evolved as a boundary formation factor,  
367 its putative ancestral role (**Fig. 8E-F**). Consequently, loss-of-function of COM1 homologs result  
368 in lack of boundaries and subsequent organ fusion, e.g. BM into IM, as demonstrated by a low  
369 number of lateral branches in maize mutants. Notably, this loss of function did not change the  
370 overall inflorescence architecture in non-Triticeae grasses. Barley COM1 loss-of-function,  
371 however, increases branch formation/extension mostly from SMs, a clear deviation from the  
372 canonical spike form. As barley *COM1* displayed a similar boundary mRNA expression as seen  
373 in maize, we presume that barley COM1 functions through boundary signaling<sup>34</sup>, thereby



374 affecting the identity of adjacent SMs. The formation of boundary regions in barley *com1*  
375 mutants (no organ fusion) via pathway(s) independent of *COM1* (**Fig. 8G-H**), and thus  
376 separation of meristematic zones in this mutant, implies that barley IM-to-SM boundary cells  
377 fail to deliver proper identity-defining signals to SMs. This signaling failure may perturb  
378 transcriptional programs required to establish identity in barley SMs; such meristems eventually  
379 revert back to IM-like meristems forming a branch-like structure (**Fig. 5H**). The function of the  
380 boundary, and boundary-expressed genes (e.g., maize *RAMOSA1-3*), as a signaling center for  
381 adjacent meristems, e.g. SMs, has been proposed in grasses, yet features of these signals remain  
382 unknown<sup>34</sup>. Signals associated with *COM1* might include micromechanical forces derived from  
383 formation of rigid cell walls enclosing boundary cells. Involvement of *COM1* in printing such  
384 mechanical regulation is supported by our anatomical analysis of palea cell walls and further  
385 confirmed by our transcriptome analysis of immature barley spike samples. *HvLGI*, *HvLSI* and  
386 genes encoding one LRR-RLK, one CYP450 and two XTHs were among the most downregulated  
387 in the mutant and involved in defining cell wall properties<sup>30-32,35</sup>. The contribution of boundary  
388 cell wall mechanics in guiding organogenesis within reproductive tissues has been well described  
389 in eudicot species<sup>36,37</sup>.

390 Such functional differences usually include constraints on expression patterns, protein  
391 sequence/structure or participation in molecular networks, often assumed to be associated with  
392 gene duplication<sup>25</sup>. Notably, *COM1* shows no sign of duplication within the barley genome and  
393 as mentioned above displays a similar expression pattern to maize<sup>14,15</sup>. Thus, *COM1*'s  
394 functional difference and implication in boundary-derived signaling seem to be associated with  
395 its protein sequence (**Fig. 2D**) and the respective downstream molecular networks. Furthermore,  
396 *COM1*'s role in regulating floral complexity-levels in grasses fits well with the view that TCP  
397 transcription factors are growth regulators and evolutionary architects of plant forms that create

398 diversity<sup>38</sup>. They influence the final architecture of plants in response to endogenous and/or  
399 external conditions. Thus, the barley floral reductionism (from compound spike to spike form;  
400 **Fig. 1A-D**) contributed by *COM1*, might be a response to the ecological expansion of the  
401 Triticeae into more temperate climates<sup>3</sup>.

402 In summary, our findings enabled identification of a barley SM identity pathway, *VRS4 (HvRA2)*  
403  $\rightarrow$  *COM1*  $\rightarrow$  *HvLG1*, which works partially independent of *COM2* and inhibits spike-branching  
404 via boundary-defined signals (**Fig. 8A and Supplementary Fig. 10**). Our model of branch-  
405 inhibition in barley spikes opens a new window into grass inflorescence evolution and molecular  
406 crop breeding, and the elevated grain number per spike in *com1.a/com2.g* double mutants supports  
407 this notion.

408

## 409 Methods

### 410 **Barley Plant material**

411 The Nordic Genetic Resource center, the National Small Grains Collection (US Department of  
412 Agriculture), and the IPK gene bank were inquired to access ‘Compositum-Barley’ mutants  
413 (Supplementary Table 4). Bowman NIL carrying *com1.a* allele ((i.e., BW-NIL(*com1.a*); syn.  
414 BW189 or CIho 11333)), its two-rowed progenitor Foma and Wt barley cv. Bowman were used  
415 for phenotypic descriptions, whole genome shotgun sequencing (WGS) (see below) as well as SEM  
416 analysis. Plant material used to generate mapping populations is reported in the corresponding  
417 section for genetic mapping. For haplotype analysis, a core collection including of 146 diverse  
418 barley landraces and 90 diverse wild barleys were sequenced<sup>28,29</sup> (**Source data file for**  
419 **Supplementary Fig. 7**).

420

## 421 **Plant phenotyping**

422 **Barley:** For phenotyping the mapping population, BW-NIL(*com1.a*) , Bowman and the  
423 corresponding segregating populations (F<sub>2</sub> and F<sub>3</sub>) were grown side by side under greenhouse  
424 conditions at the IPK. For a plant to be assigned as a branched spike mutant, spike shape at all  
425 tillers was visually inspected for presence of at least one extra spikelet at any rachis node. Grain  
426 related characters such as weight, number, etc. were also measured at harvest for the two parental  
427 lines of the mapping population. In case of phenotyping of the barley TILLING population (see  
428 below and the **Supplementary Table 4**), other induced mutants (**Supplementary Table 4**) as well  
429 as the BW-NIL(*com1.a*) / BW-NIL(*com2.g*) double mutants (see below), visual phenotyping for  
430 variation in palea structure was also applied in addition to the aforementioned phenotyping  
431 approach used for spike-branching in F<sub>2</sub> and F<sub>3</sub> progenies. In case of TILLING, from the six  
432 mutants for which the spike-branching phenotype was observed at M4, only three (carrying  
433 mutation inside the protein domain; M4.15104, M4.4406, and M4.2598) were subjected for further  
434 study at M5 generation. For which, one M4 plant was selected from which 16 M5 plants were  
435 grown and phenotyped.

436 ***Brachypodium distachyon*:** An already published TILLING population and the corresponding Wt  
437 accession Bd21-3 were used for phenotyping <sup>39</sup>. That included measurement of branch angle, as  
438 proxy for pulvinus size, spikelet number per spike, floret number per spikelet and palea structure.  
439 Hence, per M4 plants, only homozygous M5 plants either with mutant genotype aa (3 to 4 plants)  
440 or wild type bb (3 to 4 plants) were selected. Per M5 plants, 10 M6 plants were grown under  
441 greenhouse conditions at the IPK and used for measurement. Thus, 30 to 40 plants per group and  
442 for each plant angles of basal spikelets in main tillers were considered for measurement. To this  
443 end, spikes were first imaged and then imported to the ImageJ tool

444 (<https://imagej.nih.gov/ij/index.html>) for angle measurement. In case of original wild type Bd21-  
445 3, five plants were grown and measured. The same set of plants and the corresponding spike images  
446 were used to calculate number of spikelets per spike and number of florets per spikelet. In case of  
447 palea phenotyping: paleae were visually inspected across all spikes per plant. We detected plants  
448 with paleae being sensitive to exogenous finger-pressure, and thus such plants were scored as  
449 mutants. A gentle finger-pressure led the mutant paleae to crash from the middle longitude-line so  
450 that a scissors-like structure was formed (**Fig. 3G**). The crashing was not evident in Wt plants even  
451 with severe exogenous hand-pressure.

452

453 **Sorghum:** An already published TILLING population and the corresponding Wt accession  
454 BTx623 were used for phenotyping <sup>40</sup>. To measure primary branch number and angle, 5 to 8 plants,  
455 either M5 or M6 generations, per family including a Wt sorghum family cv. BTx623 were grown  
456 under greenhouse conditions at the IPK. Average primary branch (p. branch) number per panicle,  
457 e.g. per plant, was calculated by counting all p. branches that originated per each rachis node for  
458 the first 10 nodes (Supplementary Table 5). The node refers to the rachis area where whorls of  
459 branches emerge. The average p. branch number per family was then used to compare with the  
460 same value obtained from Wt family BTx623. To measure the branch angle, for each plant 3 to 4  
461 basal nodes per panicle were separately photographed. Each node contained at least 1 and up to 5  
462 lateral branches. To cover angles of each individual branch per node, each node was photographed  
463 multiple time. Images were then imported to ImageJ for angle measurement as described for  
464 Brachypodium (see above). Spikelet organs of palea and glume as well as overall grain set were  
465 also visually inspected for any visible alteration.

466

## 467 **Marker development**

468 BW-NIL(*com1.a*) and two-rowed progenitor of *com1.a*, cv. Foma, were survey sequenced using  
469 WGS approach (see below). These sequence information were compared against already available  
470 WGS of Bowman<sup>41</sup>, as present in **Supplementary Fig. 1**. Polymorphisms e.g. SNPs detected  
471 from this comparison (named as Next Generation Sequencing based markers (NGS-based  
472 markers)) between the two parental lines were converted to restriction enzyme based CAPS  
473 (<http://nc2.neb.com/NEBcutter2/>) markers to derive a restriction based genetic marker as  
474 previously described<sup>13</sup>. The developed genetic markers (**Supplementary Table 1**) were used to  
475 screen the corresponding mapping population.

476

## 477 **Genetic mapping and map-based cloning of *com1.a***

478 *com1.a* was initially proposed to be located in chromosome 5HL with unknown genetic position  
479<sup>12</sup>. A barley F<sub>2</sub> mapping population was developed by crossing Bowman introgression line, BW-  
480 NIL(*com1.a*), and barley cv. Bowman. For initial mapping 180 individuals were analyzed and  
481 genotyped using the aforementioned NGS based markers. The pattern of segregation between  
482 mutant and Wt F<sub>2</sub> plants fitted a 3:1 ratio typical for a monogenic recessive gene. Linkage analysis  
483 of segregation data was carried out using maximum likelihood algorithm of Joinmap 4.0. Kosambi  
484 mapping function was used to convert recombination fractions into map distances. The linkage  
485 mapping was further followed by a high-resolution genetic mapping in which almost 6,000 gametes  
486 were screened with the flanking markers NGS045 and NGS049. For narrowing down the *com1.a*  
487 genetic interval; the identified recombinants (a set of 109) were used. From 109, a set 15 F<sub>2</sub> were  
488 labeled (**Supplementary Table 2-3**) to be critical recombinants for precisely defining the *com1.a*  
489 genetic interval. From each of the 15 critical plants, 16 F<sub>3</sub> progenies were evaluated for their

490 phenotypes and marker genotypes at the *com1.a* candidate gene. (**Supplementary Table 2 and**  
491 **S3**). Based on F<sub>2</sub> high-resolution mapping and F<sub>3</sub> genetic analysis described, two tightly linked  
492 markers, NGS084 and NGS094, were taken to harvest the available barley genome BAC  
493 sequence data (data not shown). A single BAC contig spanning 1.4 Mb of the minimal tiling  
494 path (MTP) was identified. Genes in this region were utilized for marker development and  
495 further genetic mapping that resulted in identification of a ~380 kb region deleted in the mutant  
496 BW-NIL(*com1.a*). The deleted fragment contains a single gene, i.e., *com1.a*.

497

#### 498 **Allelism test of *com1* mutants.**

499 Mut.3906 mutant (**Supplementary Table 4**) was crossed with BW-NIL(*com1.a*) to test for  
500 allelism. The resultant F<sub>1</sub> plants showed a mutant spike phenotype confirming to be allelic with  
501 *com1*. All alleles showed phenotypic similarities with *com1* and mutations in the *COM1* gene  
502 sequences.

503

#### 504 **Double-mutant analysis**

505 Double mutants (DM) were generated by crossing mutant BW-NIL(*com1.a*) to BW-NIL(*com2.g*),  
506 followed by selfing of the F<sub>1</sub> progeny. All obtained 183 F<sub>2</sub> plants were subsequently genotyped  
507 (**Supplementary Table 1**). In case of *com2.g* mutation detection, a primer pair (Com2-  
508 Bw\_Sfil\_FR; **Supplementary Table 1**) spanning the A300C haplotype (that differentiate the Wt  
509 Bowman allele A from *com2.g* mutant C allele at position 300bp<sup>13</sup>) were used for sequencing and  
510 to classify F<sub>2</sub> genotypes for the *com2* locus. Thus, genotypic classes include C300C allele as  
511 homozygous mutant, AA as Wt and CA as heterozygous. In case of *com1.a*, a presence/absence

512 marker was used (**Supplementary Table 1**), where absence of the *COMI* gene was considered as  
513 homozygous *com1.a* mutant. A total number of five plants were recovered as homozygous double  
514 mutants (from 183 F<sub>2</sub> plants) that were used for generating F<sub>3</sub> plants used in subsequent DM  
515 phenotypic analysis (**Fig. 7**). Two DM F<sub>3</sub> families, each consisting of 20 plants along with 20  
516 plants from each of the single mutants and 20 wild type cv. Bowman plants, were grown and used  
517 for phenotyping (**Fig. 7**).

518

### 519 **TILLING analysis**

520 **Barley:** For identifying further mutant alleles of *COMI* in barley TILLING populations including  
521 EMS (Ethyl methanesulfonate) treated population of cv. Barke consisting 10279 individuals were  
522 screened<sup>42</sup>. A primer combination (**Supplementary Table 1**) was used to amplify the coding  
523 region of the *COMI* gene. The amplicon was subjected to standard procedures using the  
524 AdvanCETM TILLING kit as described in<sup>13</sup>. Amplified products were digested with dsDNA  
525 cleavage kit followed by analysis via mutation discovery kit and gel-dsDNA reagent kit. These  
526 were performed on the AdvanCETM FS96 system according to manufacturer's guidelines  
527 (advancedanalytical, IA, USA). The amplified ORF was also re-sequenced by Sanger sequencing  
528 using primers listed in **Supplementary Table 1**.

529 **Brachypodium distachyon:** Mutation detection screenings were performed in the TILLING  
530 collection of chemically induced Brachypodium mutants, described in<sup>39</sup>. TILLING by NGS  
531 consists to sequence 500 bp PCR fragments libraries prepared from 2600 individual genomic DNA  
532 pooled in two dimensions. A dual indexing system, one placed on the 5'adaptater, and the second  
533 one on the 3'adaptater, added by a two-step PCR (for primer sequence; see **Supplementary Table**  
534 **1**) allow a direct identification of the sequence identities. The first PCR amplification is a standard

535 PCR with target-specific primers carrying Illumina's tail (**Supplementary Table 1**) and 10 ng of  
536 Brachypodium genomic DNA. Two microliters of the first PCR product served as a template for  
537 the second PCR amplification, with a combination of Illumina indexed primers (**Supplementary**  
538 **Table 1**). The sequencing step of PCR fragments was done on an Illumina Miseq personal  
539 sequencer using the MiSeq Reagent Kit v3 (Illumina®) followed by quality control processes for  
540 libraries using the PippinHT system from SAGE Sciences for libraries purification, and the  
541 Bioanalyzer™ system from Agilent®. To identify induced mutations, a bioinformatic pipeline,  
542 called "Sentinel" was used to analyze the data sequences  
543 (IDDN.FR.001.240004.000.R.P.2016.000.10000). Prediction of the impact of each mutation  
544 (**Supplementary Table 4**) was made with SIFT software as described in <sup>39</sup>. The amplified ORF  
545 was also re-sequenced by Sanger sequencing using primers listed in **Supplementary Table 1**.

546 **Sorghum:** A pedigreed sorghum mutant library was established in the inbred line BTx623, which  
547 was used to produce the sorghum reference genome. This mutant library consists of 6,400 M4 grain  
548 pools derived from EMS-treated sorghum grains by single seed descent. Whole genome sequencing  
549 of a set of 256 lines uncovered 1.8 million canonical EMS-induced mutations <sup>39</sup>. We searched the  
550 sorghum ortholog of the barley *COM1* in the aforementioned sequence database to identify plants  
551 carrying mutation. To confirm the mutations, the amplified ORF was also re-sequenced by Sanger  
552 sequencing using primers listed in Supplementary Table 1.

### 553 **Haplotype and network analysis**

554 Genomic DNA from a core collection including 146 landrace and intermedium-spike barley  
555 accessions as well as 90 wild barley (Source data file for Supplementary Fig. 7) was PCR-amplified  
556 using specific primers to amplify full coding sequence of the barley *COM1* gene. Amplified  
557 fragments were used for direct PCR sequencing (Sanger method; BigDye Terminator v3.1 cycle



558 sequencing kit; Applied Biosystems). A capillary-based ABI3730xl sequencing system  
559 (Applied Biosystems) at the sequencing facility of IPK was used to separate the fluorescently  
560 terminated extension products. Sequence assembly was performed using Sequencher 5.2.2.3.  
561 Visual inspection of sequence chromatograms was carried out using Sequencher to detect the  
562 corresponding SNPs. Network analysis of the nucleotide haplotypes was carried out using TCS  
563 v1.21 software (<http://darwin.uvigo.es/software/tcs.html>)<sup>43</sup>.

564

### 565 **RNA extraction, sequencing and data analysis**

566 **RNA Extraction:** For the RNA-seq study, immature spike tissues were collected from BW-  
567 NIL(*com1.a*) and Wt progenitor Bowman and the donor cv. Foma. Plants were grown under  
568 phytochamber conditions of 12h light (12 °C) and 12h dark (8 °C). Tissues were always collected  
569 at the same time slot (14:00 to 17:00) during the day at three different developmental stages  
570 including TM and GP, and pooled stages of LP+SP. Three biological replicated were applied  
571 that resulted in 27 individual tissue samples. The TRIzol method (Invitrogen) was applied to  
572 extract total RNA from immature spike tissues followed by removal of genomic DNA  
573 contamination using RNase-free DNase (Invitrogen). RNA integrity and quantities were analyzed  
574 via Agilent 2100 Bioanalyzer (Agilent Technologies) and Qubit (Invitrogen), respectively.

575 **Preparation and sequencing of mRNA-Seq libraries:** SENSE mRNA-Seq libraries (27 = 3  
576 reps/3 stages /3 genotype) were prepared from 2 µg total RNA according to the protocol provided  
577 by the manufacturer (Lexogen GmbH, Vienna, Austria). Libraries were pooled in an equimolar  
578 manner and analysed electrophoretically using the Agilent 4200 TapeStation System (Agilent  
579 Technologies, Inc., Santa Clara, CA, USA). Quantification of libraries and sequencing (rapid run,

580 paired-end sequencing, 2 x 100 cycles, on-board clustering) using the Illumina HiSeq2500 device  
581 (Illumina, San Diego, California, USA) were as described previously <sup>44</sup>.

582

### 583 **Analysis of the RNAseq data:**

584 The reads from all three biological replicates were pooled per stage and each pool was  
585 independently mapped to barley pseudomolecules <sup>41</sup>,  
586 (160404\_barley\_pseudomolecules\_masked.fasta) using TopHAT2 <sup>45</sup>. Gene expression was  
587 estimated as read counts for each gene locus with the help of featureCounts <sup>46</sup> using the gene  
588 annotation file Hv\_IBSC\_PGSB\_r1\_HighConf.gtf and fragment per million (FPM) values were  
589 extracted from the BWA-aligned reads using Salmon <sup>47</sup>. Genes that showed FPM of 0 across all 45  
590 samples were excluded from expression levels calculations. Expression levels were normalized by  
591 TMM method and *p*-values were calculated by an exact negative binomial test along with the gene-  
592 specific variations estimated by empirical Bayes method in edgeR <sup>48</sup>. The Benjamini-Hochberg  
593 method was applied on the *p*-values to calculate *q*-values and to control the false discovery rate  
594 (FDR). Differentially expressed genes (DEGs) were defined as *q*-value < 0.05, log<sub>2</sub> fold change >  
595 1 or < -1.

### 596 ***Quantitative RT-PCR***

597 Tissue sampling, RNA extraction, qualification and quantification was performed as described  
598 above. Reverse transcription and cDNA synthesis were carried out using SuperScript III Reverse  
599 Transcriptase kit (Invitrogen). Real-time PCR was performed using QuantiTect SYBR green PCR  
600 kit (Qiagen) and the ABI prism 7900HT sequence detection system (Applied Biosystems). Each  
601 qRT-PCR comprised at least four technical replicates, and each sample was represented by three

602 biological replicates. The *Actin* gene-based primers (**Supplementary Table 1**) were used as the  
603 reference sequence. qRT-PCR results were analyzed using SDS2.2 tool (Applied Biosystems) in  
604 which the presence of a unique PCR product was verified by dissociation analysis. Significance  
605 values were calculated using *Student's t*-test (two-tailed). The relevant primer sequences per  
606 species are detailed in **Supplementary Table 1**.

607

### 608 **Phylogenetic analysis**

609 A comprehensive analysis of TCP proteins in grasses was already available we therefore focused  
610 only on constructing a detailed phylogeny of the COM1 protein among grasses and the barley TCP  
611 genes. Thus, barley COM1 was then queried against Ensembl Plants database to retrieve its  
612 orthologs or homologs from other grasses. The same database was also used to extract all barley  
613 TCP proteins. In case of COM1, protein and DNA sequence of the paralog and homologous genes  
614 from each of the grass species were retrieved. To re-check their homology with barley COM1, the  
615 retrieved sequences were blasted back against the barley genome. For phylogenetic analysis,  
616 protein sequences were initially aligned using the algorithm implemented in CLC sequence viewer  
617 V7.8.1 (<https://www.qiagenbioinformatics.com> ). UPGMA tree construction method and the  
618 distance measure of Jukes-Cantor were implemented for constructing the phylogenetic tree using  
619 CLC sequence viewer. The bootstrap consensus tree inferred from 1000 replicates was taken to  
620 represent the evolutionary relationship of the sequences analyzed.

### 621 ***mRNA in situ hybridization***

622 In case of *COM1*, three separated segments (excluding the TCP domain) from the *COM1* gene each  
623 containing 300-360 bp were synthesized (probe 1 and 2, GenScript Biotech, Netherlands, Source

624 data files) or amplified (probe 3) using cDNAs isolated from immature spikes of cv. Bonus and  
625 specific primers (Supplementary Table 1). The resulting products were cloned into pBluescript II  
626 KS (+) vector (Stratagene, La Jolla, CA, USA and GenScript Biotech, Netherlands). Linearized  
627 clones by HindIII or NotI were used as templates to generate antisense (HindIII) and sense (NotI)  
628 probes using T3 or T7 RNA polymerase. *In situ* hybridization was conducted with a single pool of  
629 the three aforementioned probes as described previously <sup>49</sup>.

630 For the *HvLG1* gene, a single probe, derived from the third exon (see Source data files for probe  
631 sequence) was synthesized (GenScript Biotech, Netherlands). The aforementioned approach  
632 described for *COM1* was conducted for *in situ* hybridization.

633

#### 634 **Scanning electron microscopy**

635 Scanning electron microscopy (SEM) was performed on immature spike tissues at five stages  
636 including triple mound, glume, lemma, stamen, and awn primordium from greenhouse-grown  
637 plants. SEM was conducted as described elsewhere <sup>50</sup>.

638

#### 639 **DNA preparation**

640 DNA was extracted from leaf samples at the seedling as described before <sup>13</sup>. Plants for which the  
641 DNA was prepared included barley, *Sorghum* and *Barchypodium*. That included either mapping  
642 population, TILLING mutants or both.

#### 643 **Palea anatomical and TEM analyses.**

644 For anatomical study as well as transmission electron microscopy (TEM), plant material consisting  
645 of intact spikes was collected shortly before anthesis. Spikelets containing no grains were used for  
646 dissecting paleae that were subsequently stored in fixative (4% FA, 1% GA in 50 mM phosphate  
647 buffer). Central spikelets (in case of barley) were isolated and placed in a 15 ml test tube containing  
648 10 ml fixative, followed by extensive degassing until all probes had settled. Material was stored in  
649 a fridge until use. After three washes with A.D., lemma and palea were isolated by cutting away a  
650 small part at the base of the spikelet. Isolated paleae were placed in a flat bottomed mold filled  
651 with 4% liquid agarose (~60°C). After setting, agarose blocks were removed from the mold and  
652 the encapsulated Palea was cut into 1-2mm wide sections using fresh razor blades. The embedding  
653 in agarose facilitated the cuttings while preventing unnecessary damage to the probes. After  
654 embedding in Spurr resin (see next page) semithin sections of 2 µm were cut on an Leica Ultracut.  
655 Sections were allowed to be baked in a droplet of 0,02% Methylene blue/Azur blue on a heating  
656 plate set at 90°C. Recordings were made using a Keyence VHX-5000 digital microscope (Keyence  
657 Germany GmbH, Neu-Isenburg, Germany).

658

### 659 **Sequence information and analysis**

660 Unpublished sequence information for the BAC contigs 44150 spanning the interval between  
661 NGS084 and NGS094) was made available from the international barley sequencing consortium  
662 (through Nils Stein). This sequence information was used for marker development during high  
663 resolution mapping, map-based cloning and *COM1* gene identification. Later on, the initial contigs  
664 44150 sequence information was re-checked and confirmed with the high-quality barley genome  
665 assembly and annotation data <sup>27</sup>.

### 666 **Whole genome shotgun sequencing of BW-NIL(*com1.a*)**

667 A whole-genome shotgun library was constructed using standard procedures (TruSeq DNA;  
668 Illumina) and quantified using real-time PCR. Cluster formation using the cBot device and paired-  
669 end sequencing (HiSeq2000, 2 x 101 cycles) were performed according to the manufacturer's  
670 instructions (Illumina).

671

## 672 **References**

- 673 1. Zhang, D.B. & Yuan, Z. Molecular Control of Grass Inflorescence Development. *Annual*  
674 *Review of Plant Biology*, Vol 65 **65**, 553-78 (2014).
- 675 2. Vegetti, A. & Anton, A.M. Some Evolution Trends in the Inflorescence of Poaceae. in  
676 *Flora* Vol. 190 225-228 (1995).
- 677 3. Kellogg, E.A. *et al.* Early inflorescence development in the grasses (Poaceae). *Frontiers*  
678 *in Plant Science* **4**(2013).
- 679 4. Endress, P.K. Disentangling confusions in inflorescence morphology: Patterns and  
680 diversity of reproductive shoot ramification in angiosperms. *Journal of Systematics*  
681 *and Evolution* **48**, 225-239 (2010).
- 682 5. Remizowa, M.V., Rudall, P.J., Choob, V.V. & Sokoloff, D.D. Racemose inflorescences of  
683 monocots: structural and morphogenetic interaction at the flower/inflorescence  
684 level. *Annals of Botany* **112**, 1553-1566 (2013).
- 685 6. Kellogg, E.A. Evolutionary history of the grasses. *Plant Physiology* **125**, 1198-1205  
686 (2001).
- 687 7. Koppolu, R. & Schnurbusch, T. Developmental pathways for shaping spike  
688 inflorescence architecture in barley and wheat. *J Integr Plant Biol* **61**, 278-295 (2019).
- 689 8. Lemmon, Z.H. *et al.* The evolution of inflorescence diversity in the nightshades and  
690 heterochrony during meristem maturation. *Genome Research* **26**, 1676-1686 (2016).
- 691 9. Malcomber, S.T., Preston, J.C., Reinheimer, R., Kossuth, J. & Kellogg, E.A. Developmental  
692 gene evolution and the origin of grass inflorescence diversity. *Advances in Botanical*  
693 *Research: Incorporating Advances in Plant Pathology*, Vol 44 **44**, 425-481 (2006).
- 694 10. Vollbrecht, E., Springer, P.S., Goh, L., Buckler, E.S. & Martienssen, R. Architecture of  
695 floral branch systems in maize and related grasses. *Nature* **436**, 1119-1126 (2005).
- 696 11. Lundqvist, U. Scandinavian mutation research in barley - a historical review. *Hereditas*  
697 **151**, 123-31 (2014).
- 698 12. Druka, A. *et al.* Genetic dissection of barley morphology and development. *Plant*  
699 *Physiol* **155**, 617-27 (2011).
- 700 13. Poursarebani, N. *et al.* The Genetic Basis of Composite Spike Form in Barley and  
701 'Miracle-Wheat'. *Genetics* **201**, 155-+ (2015).
- 702 14. Lewis, M.W. *et al.* Gene regulatory interactions at lateral organ boundaries in maize.  
703 *Development* **141**, 4590-4597 (2014).
- 704 15. Bai, F., Reinheimer, R., Durantini, D., Kellogg, E.A. & Schmidt, R.J. TCP transcription  
705 factor, BRANCH ANGLE DEFECTIVE 1 (BAD1), is required for normal tassel branch

- 706 angle formation in maize. *Proceedings of the National Academy of Sciences of the United*  
707 *States of America* **109**, 12225-12230 (2012).
- 708 16. Yuan, Z. *et al.* RETARDED PALEA1 Controls Palea Development and Floral  
709 Zygomorphy in Rice. *Plant Physiology* **149**, 235-244 (2009).
- 710 17. Zeng, D.-D. *et al.* DBOP specifies palea development by suppressing the expansion of  
711 the margin of palea in rice. *Genes & Genomics* **38**, 1095-1103 (2016).
- 712 18. Kirby, E.J.M., Appleyard, M., National Agricultural, C. & Arable, U. *Cereal development*  
713 *guide*, (Arable Unit, National Agricultural Centre, Kenilworth, England, 1986).
- 714 19. Cosgrove, D. Biophysical Control of Plant-Cell Growth. *Annual Review of Plant*  
715 *Physiology and Plant Molecular Biology* **37**, 377-405 (1986).
- 716 20. Cosgrove, D.J. Plant cell wall extensibility: connecting plant cell growth with cell wall  
717 structure, mechanics, and the action of wall-modifying enzymes. *Journal of*  
718 *Experimental Botany* **67**, 463-476 (2016).
- 719 21. Martin-Trillo, M. & Cubas, P. TCP genes: a family snapshot ten years later. *Trends Plant*  
720 *Sci* **15**, 31-9 (2010).
- 721 22. Zhao, J. *et al.* Genome-Wide Identification and Expression Profiling of the TCP Family  
722 Genes in Spike and Grain Development of Wheat (*Triticum aestivum* L.). *Frontiers in*  
723 *Plant Science* **9**(2018).
- 724 23. Francis, A. *et al.* Comparative phylogenomic analysis provides insights into TCP gene  
725 functions in Sorghum. *Scientific Reports* **6**(2016).
- 726 24. Mondragon-Palomino, M. & Trontin, C. High time for a roll call: gene duplication and  
727 phylogenetic relationships of TCP-like genes in monocots. *Ann Bot* **107**, 1533-44  
728 (2011).
- 729 25. Studer, R.A. & Robinson-Rechavi, M. How confident can we be that orthologs are  
730 similar, but paralogs differ? *Trends in Genetics* **25**, 210-216 (2009).
- 731 26. Jiao, Y.P. *et al.* MSD1 regulates pedicellate spikelet fertility in sorghum through the  
732 jasmonic acid pathway. *Nature Communications* **9**(2018).
- 733 27. Aguilar-Martinez, J.A., Poza-Carrion, C. & Cubas, P. Arabidopsis BRANCHED1 acts as  
734 an integrator of branching signals within axillary buds. *Plant Cell* **19**, 458-472 (2007).
- 735 28. Koppolu, R. *et al.* *Six-rowed spike4 (Vrs4)* controls spikelet determinacy and row-type  
736 in barley. *Proceedings of the National Academy of Sciences of the United States of*  
737 *America* **110**, 13198-13203 (2013).
- 738 29. Russell, J. *et al.* Exome sequencing of geographically diverse barley landraces and wild  
739 relatives gives insights into environmental adaptation. *Nature Genetics* **48**, 1024-+  
740 (2016).
- 741 30. Liu, K. *et al.* Wheat *TaSPL8* Modulates Leaf Angle Through Auxin and  
742 Brassinosteroid Signaling. *Plant Physiology* **181**, 179-194 (2019).
- 743 31. Van der Does, D. *et al.* The Arabidopsis leucine-rich repeat receptor kinase MIK2/LRR-  
744 KISS connects cell wall integrity sensing, root growth and response to abiotic and  
745 biotic stresses. *Plos Genetics* **13**(2017).
- 746 32. Gou, M.Y., Ran, X.Z., Martin, D.W. & Liu, C.J. The scaffold proteins of lignin biosynthetic  
747 cytochrome P450 enzymes. *Nature Plants* **4**, 299-310 (2018).
- 748 33. Chiba, Y., Mitani, N., Yamaji, N. & Ma, J.F. HvLsi1 is a silicon influx transporter in barley.  
749 *Plant Journal* **57**, 810-818 (2009).
- 750 34. Whipple, C.J. Grass inflorescence architecture and evolution: the origin of novel  
751 signaling centers. *New Phytol* **216**, 367-372 (2017).

- 752 35. Hara, Y., Yokoyama, R., Osakabe, K., Toki, S. & Nishitani, K. Function of xyloglucan  
753 endotransglucosylase/hydrolases in rice. *Annals of Botany* **114**, 1309-1318 (2014).
- 754 36. Tameshige, T., Hirakawa, Y., Torii, K.U. & Uchida, N. Cell walls as a stage for  
755 intercellular communication regulating shoot meristem development. *Frontiers in*  
756 *Plant Science* **6**(2015).
- 757 37. Landrein, B. & Ingram, G. Connected through the force: mechanical signals in plant  
758 development. *Journal of Experimental Botany* **70**, 3507-3519 (2019).
- 759 38. Manassero, N.G., Viola, I.L., Welchen, E. & Gonzalez, D.H. TCP transcription factors:  
760 architectures of plant form. *Biomol Concepts* **4**, 111-27 (2013).
- 761 39. Dalmais, M. *et al.* A TILLING Platform for Functional Genomics in Brachypodium  
762 distachyon. *PLoS One* **8**, e65503 (2013).
- 763 40. Jiao, Y.P. *et al.* A Sorghum Mutant Resource as an Efficient Platform for Gene Discovery  
764 in Grasses. *Plant Cell* **28**, 1551-1562 (2016).
- 765 41. Mascher, M. *et al.* A chromosome conformation capture ordered sequence of the  
766 barley genome. *Nature* **544**, 427 (2017).
- 767 42. Gottwald, S., Bauer, P., Komatsuda, T., Lundqvist, U. & Stein, N. TILLING in the two-  
768 rowed barley cultivar 'Barke' reveals preferred sites of functional diversity in the gene  
769 HvHox1. *BMC Res Notes* **2**, 258 (2009).
- 770 43. Clement, M., Posada, D. & Crandall, K.A. TCS: a computer program to estimate gene  
771 genealogies. *Mol Ecol* **9**, 1657-9 (2000).
- 772 44. Beier, S. *et al.* Construction of a map-based reference genome sequence for barley,  
773 *Hordeum vulgare* L. *Scientific Data* **4**, 170044 (2017).
- 774 45. Kim, D. *et al.* TopHat2: accurate alignment of transcriptomes in the presence of  
775 insertions, deletions and gene fusions. *Genome Biology* **14**, R36 (2013).
- 776 46. Liao, Y., Smyth, G.K. & Shi, W. featureCounts: an efficient general purpose program for  
777 assigning sequence reads to genomic features. *Bioinformatics* **30**, 923-930 (2014).
- 778 47. Patro, R., Duggal, G., Love, M.I., Irizarry, R.A. & Kingsford, C. Salmon provides fast and  
779 bias-aware quantification of transcript expression. *Nature Methods* **14**, 417-+ (2017).
- 780 48. Robinson, M.D., McCarthy, D.J. & Smyth, G.K. edgeR: a Bioconductor package for  
781 differential expression analysis of digital gene expression data. *Bioinformatics* **26**,  
782 139-140 (2010).
- 783 49. Komatsuda, T. *et al.* Six-rowed barley originated from a mutation in a homeodomain-  
784 leucine zipper I-class homeobox gene. *Proceedings of the National Academy of Sciences*  
785 *of the United States of America* **104**, 1424-1429 (2007).
- 786 50. Lolas, I.B. *et al.* The transcript elongation factor FACT affects Arabidopsis vegetative  
787 and reproductive development and genetically interacts with HUB1/2. *Plant J* **61**, 686-  
788 97 (2010).

789

790 **Acknowledgments:** We thank the US Department of Agriculture–Agricultural Research Service  
791 (USDA-ARS), the National Small Grains Collection, Aberdeen (ID); the Nordic Genetic Resources  
792 Center (NordGen), Alnarp, Sweden; and the IPK Genebank, Germany, for providing the mutants  
793 and germplasm for haplotype analysis. The authors would like to thank Dr. Shun Sakuma for



794 fruitful discussions and help in conducting mRNA *in-situ* hybridizations. We are thankful to Anne  
795 Fiebig for help with data submission to ENA and Sandra Driesslein, Jenny Knibbiche, Mechthild  
796 Pürschel, Ines Walde, Kerstin Wolf, Marion Benecke and Kirsten Hoffie for excellent technical  
797 assistance.

798  
799 **Funding:** During this study, research in the Schnurbusch laboratory received financial support  
800 from the Federal Ministry of Education and Research (BMBF) FKZ 0315954A and 031B0201A,  
801 HEISENBERG Program of the German Research Foundation (DFG), grant No. SCHN 768/8-1  
802 and SCHN 768/15-1, as well as IPK core budget.

803  
804 **Author contributions:** T.S. conceived the idea for the study, designed and monitored experiments,  
805 and analyzed data. N.P. expanded the idea for the study, designed and performed experiments and  
806 analyzed data; C.T. executed the mRNA *in-situ* hybridizations. M.M. conducted microscopic  
807 analyses of cellular structures in paleae. T.N. analyzed RNA-seq data. U.L. provided irregular and  
808 intermedium barley spike mutants. T.R. executed SEM analyses. T.Schm. conducted sequence read  
809 mapping to unpublished barley genomic sequences for SNP calling. R.B., A.H. and L.A. performed  
810 the initial whole-genome shotgun sequencing of the parental genotypes for mapping. R.K. was  
811 involved in the phenotypic analysis of *com1.a* and RT-qPCR analyses of *COM1* in barley *vrs4*  
812 mutant. H.M.Y. provided sequences from a barley diversity panel for haplotype analysis and was  
813 involved in the RT-qPCR analysis. R.S., M.D. and A.B. provided the Brachypodium TILLING  
814 resource; N.S. provided the barley TILLING resource; Z.X. provided the sorghum TILLING  
815 resource. N.P. and T.S. wrote the manuscript including contributions from co-authors. All authors  
816 have seen and agreed upon the final version of the manuscript.

817

818 **Competing interests:**

819 The authors declare no conflict of interest.

820

821 **Data and materials availability:**

822 Barley mutants are available from TS under a material transfer agreement (MTA) with IPK-  
823 Gatersleben. All data are available in the main text or online materials. The RNA-seq data and the  
824 whole genome shotgun (WGS) sequences of *com1.a* mutant have been submitted to the European  
825 Nucleotide Archive under accession number PRJEB35746 and PRJEB35761, respectively. COM1  
826 sequences are available with the corresponding ID mentioned in the current study in the public  
827 databases <https://plants.ensembl.org/> & <https://apex.ipk-gatersleben.de/apex/f?p=284:10> and are in  
828 the process of submission to NCBI as well. The source data underlying figures (Fig. 5Q-S, Fig.  
829 6D-G, Fig. 7I-N, Fig. 8A-B, Fig. 8C-D, and Supplementary Fig. 7) and tables (Supplementary  
830 Table 5) are provided as Source Data files.

831

832 **Figure Legends:**

833 **Main Figures**

834 **Fig. 1 Proposed evolutionary pattern of grass inflorescences, and the spike/palea morphology**  
835 **of wild-type and *com1.a* mutant e.g. BW-NIL(*com1.a*) barley. (A–D) Model for grass**  
836 **inflorescence evolution from ancestral compound form to spike in Triticeae; re-drawn from <sup>2</sup>. (E)**  
837 **Spike morphology of wild-type (Wt), two-rowed barley cv. Bowman. (F–I) SEM imaging of the**

838 early developmental stages in immature Wt spike; triple mound: TM (F), glume primordium: GP  
839 (G), lemma primordium: LP (H) and stamen primordium: SP (I). Images are taken from basal  
840 nodes where a single node is used for color coding. (J) Dorsal view of whole immature Wt spike  
841 at stamen primordium stage. (K) Branched spike of BW-NIL(*com1.a*) mutant at maturity. (L–M)  
842 Depicted is a small, spike-like branch structure, arisen from the central spikelet position due to loss  
843 of CSM identity, from intense (L) to weak appearance as an extended (ext.) rachilla (M), M also  
844 depicts a developing grain enclosed by lemma and palea. (N–O) Lack of pulvinus at the base of a  
845 branch in BW-NIL(*com1.a*) mutant spike (N) supported by histological imaging (O). (P–S)  
846 Developmental stages of immature BW-NIL(*com1.a*) mutant spike from early GP (P), GP (Q), to  
847 LP (R) and early SP (S) taken from the basal nodes. (T) Dorsal view of whole immature BW-  
848 NIL(*com1.a*) mutant spike at early stamen primordia. (U) Longitudinal adaxial view of the palea  
849 in BW-NIL(*com1.a*); white rectangle corresponds to the area used to take sections for histological  
850 analysis and to the lower image depicting the flat-plane surface of a palea cross section. (V)  
851 Longitudinal adaxial view of the palea in Wt; the lower image corresponds to the infolding surface  
852 of a palea cross section. (W–X) Histological analyses of transverse sections (from U and V; white  
853 rectangles) of the palea in BW-NIL(*com1.a*) (W) and Wt (X). Paleae are from spikelets shortly  
854 before anthesis. (Y–Z) TEM based imaging of walls of paleae cells in BW-NIL(*com1.a*) (Y) versus  
855 Wt (Z).

856

857 **Fig. 2 Map-based cloning of the gene underlying *com1.a*, phylogenetic analysis and protein**  
858 **structural variation of COM1.** (A) Physical and genetic maps of *com1.a* from 100 recombinant  
859 plants or ~6,000 gametes. A single gene (red; HORVU5Hr1G061270, a single-exon TCP  
860 transcription factor) was the strongest candidate and deleted in the mutant parent *com1.a*. (B)

861 *COM1* gene model containing one TCP DNA binding domain (green box). Six barley TILLING  
862 alleles are shown with prefix M3. (C) UPGMA phylogenetic tree, using 1000 bootstrap  
863 replications, of COM1 homologs (highlighted in light gray) and paralogs (in dark gray) appeared  
864 as first- and second-best hits, respectively, in the blast search. Bootstrap values (in percentage) are  
865 shown within the circular cladogram along the edges of the branches. (D) Evolutionarily conserved  
866 motifs, among COM1 homologs and paralogous proteins (presented as phylogenetic tree in Fig.  
867 2C), using the tool SALAD. Each colored box represents a different and numbered protein motif.  
868 For example, motif 1 in light green represents the TCP domain. Motifs 7, 13, 15 and 17 of the  
869 REP1/COM1 clade are specific to the Triticeae. (see also **Supplementary Fig. 6**).

870

871 **Fig. 3. Barley *COM1* mutant alleles showing spike-branching and paleae phenotypes.**  
872 Different induced mutant alleles identified by resequencing of primers correspond to CDS and  
873 putative promotor region of *COM1*. The corresponding palea is shown in the upper-right side of  
874 each spike image. See also **Supplementary Table 1** and 4.

875

876 **Fig. 4. Spike and paleae phenotypes of barley TILLING lines.** A representative display of  
877 branch formation of the six barley TILLING mutant plants derived from barley *cv.* Barke. The  
878 corresponding palea is shown in the upper-right side of each spike image. For the underlying protein  
879 sequence lesion, see **Supplementary Figure 3**.

880

881 **Fig. 5. Inflorescence morphology and gene expression patterns in sorghum (A–G) and**  
882 **Brachypodium (H–S).** (A) Sorghum inflorescence shape in Wt *cv.* BT623. (B) Compact sorghum  
883 inflorescence in TILLING mutant ARS180 showing severe reduction in grain setting

884 (Supplementary Table 5) as also reported for *rep1* mutant in rice (see Table 1). (C) Acute branch  
885 angle in mutant ARS180 versus (D) Expanded branch angle of Wt ( $5.2^\circ$  in mutant vs.  $10.95^\circ$  in  
886 Wt,  $P \leq 0.001$ ; see Supplementary Table 5). due to the lack or small size of the pulvinus. (E) Depicts  
887 lack of pulvinus at the base (black arrow) of the mutant lateral branch versus its presence (red,  
888 roundish area) in Wt (F). Arrows in yellow and pink represent the lateral primary branch and rachis,  
889 respectively, in both E and F. (G) RT-qPCR of *SbBad1/Wab1* in organs of Wt plants. 1\_1, 1\_2 and  
890 1\_3 represent first, second and third branch meristem stages, respectively. (H) Brachypodium  
891 mutant palea scissor-like structure collapses easily due to external mechanical pressure; (I)  
892 normal/solid palea structure in Wt plants. (J) Brachypodium mutant inflorescence with compact  
893 shape due to acute branch (spikelet) angles; (K) Brachypodium Wt inflorescence with normal  
894 architecture of expanded branch angle as result of normal growth with pulvinus. (L) SEM view of  
895 an abnormal tiny pulvinus (in red) of a Brachypodium mutant versus an intact normal-sized  
896 pulvinus (in red) in Wt (M); arrows in yellow and pink represent the lateral branch and rachis,  
897 respectively, both in L and M. (N) Histological view of transverse section of Brachypodium mutant  
898 palea as compared to Wt (O); Brachypodium mutant has an extra VB in the center part (red arrow)  
899 which is lacking in Wt. Center refers to the collapsed middle part while Side refers to the flanking  
900 intact area (the blades of the scissor; see part H). (P) RT-qPCR of *BdBad1/Wab1* gene expression  
901 across meristematic stages and organs in Wt. (Q) Branch angle measurement in Brachypodium as  
902 proxy for pulvinus size. (R) Number of spikelets per individual Brachypodium inflorescence  
903 (panicle). (S) Number of florets per spikelet in Brachypodium. In Q to S; data are from contrasting  
904 M6 homozygous TILLING lines of Brachypodium; aa and bb refer to homozygous mutant (aa) and  
905 Wt (bb)a alleles from the same family (Supplementary Note). Values above x-axis indicate  
906 number of items used to collect data points (representing number of angles measured in Q, and  
907 number of plants in R and S). *P* values were determined by using *Student's t* test; ns: not significant.

908 Genotype IDs below x-axis refer to the parental line of the respective M6 family. For Q-S; Source  
909 data are provided as a Source Data file.

910

911 **Fig. 6. Transcript analyses of *COM1* in two-rowed barley.** (A) Relative *COM1* expression at  
912 different stages of immature barley spike including TM, GP, SP as well as the at meristematic stage  
913 of awn primordium (AP; a stage following stamen primordium<sup>18</sup>) in cv. Bowman. (B) Relative  
914 *COM1* expression in different organs (DL; developing leaf, TB; tiller buds, IN; culm internode, N;  
915 culm node, R; Root) along with spike sections (IS-B; immature spike basal nodes, IS-C; immature  
916 spike central nodes, IS-A; immature spike apical nodes) at meristematic stage of AP in cv.  
917 Bowman. Despite expression in tiller buds, no differences in tiller number was observed  
918 (**Supplementary Fig. 4**). Dev leaf and IM stands for developing leaf and inflorescence meristem,  
919 respectively. (C) Semi-qPCR of *COM1* (left) and *HvActin* (right) mRNAs in two different stages  
920 of immature spike development, GP and LP (as positive controls) as well as in two palea samples.  
921 (D) *COM1* mRNA in-situ control hybridization using pooled sense probes (see online methods).  
922 (E–G) mRNA in-situ hybridization of *COM1* using pooled anti-sense probes. Tissues represent  
923 cross-section through a spikelet triplet at TM (E) and AP stages (F–G) of barley cv. Bonus (a two-  
924 rowed Wt). For D-G; Source data is provided as a Source Data file.

925 **Fig. 7. Immature and mature barley spike morphology in wild type versus single and double**  
926 **mutants (A–H), with their comparative grain-related characters (I–N) as well as the transcript**  
927 **levels of *COM2* in single mutant *com1.a* (O).** (A) SEM-based view of an immature spike of Wt  
928 cv. Bowman, single mutant *com1.a* (B), single mutant *com2.g* (C) and those of a DM mutant (D).  
929 In D, upper panel shows basal nodes of a DM spike at GP stage with elongated CSM (as compared  
930 to Wt in Fig. 1G) and unusually enlarged glume primordia (in purple). Numbers 1 to 5 denote five

931 IM-like branch meristems of a DM spike that eventually represents a putative ten-rowed spike. The  
932 lower panel is rotated by  $\sim 45^\circ$  to the left while imaging. Please note; IM-like branches 1 and 2 are  
933 not visible in the lower panel. Immature spikes (except D upper panel) are at similar developmental  
934 stages of early/advanced stamen primordium. Immature spikes in B and C represent a typical SBS  
935 while D corresponds to the immature CBS spike class. (E-H) Depicts mature spikes in Wt cv.  
936 Bowman (E), single mutant *com1.a* (F), single mutant *com2.g* (G) and the mature spike in a DM  
937 plant (H). F and G represent a frequent phenotype of the SBS class at maturity while D represents  
938 a mature CBS phenotype. (I-N) Grain characters of the DM plants, and the corresponding single  
939 mutant *com1.a* and *com2.g* in comparison to the Wt cv. Bowman. Data are based on a single  
940 greenhouse experiment and on averages of 20 plants (390 to 540 spikes) per phenotypic class. (O)  
941 Depicts *COM2* transcripts in the *com1.a* mutant compared to Wt cv. Bowman. Mean  $\pm$  SE of three  
942 biological replicates per stage are shown. Genotype differences were tested at a significance level  
943 of  $P > 0.05$ . For I-N; Source data are provided as a Source Data file.

944

945 **Fig. 8. Model of *COM1* regulation based on transcriptome analysis in barley (A–B), transcript**  
946 **analyses of *HvLGI* in two-rowed barley (C–D), and schematic representation of functional**  
947 ***COM1* differences from non-Triticeae (E–H).** Model of *COM1* transcriptional regulation  
948 deduced from either RNAseq or RT-qPCR results. Black arrows are interactions reported  
949 previously<sup>13,28</sup> while red arrows are detected in the current study (see Supplementary Fig. 10, the  
950 legend). (B) RNA-seq-based heat map of selected differentially expressed (DE) genes (see  
951 **Supplementary Fig. 9** for the remaining DE genes). The transcript level of each gene in mutant  
952 *com1.a* (CO) is compared with two Wts, cv. Bowman (BO; parent of the mapping population) and  
953 cv. Foma (FO; the donor line), at three different meristematic states. Transcript level =  $\text{Log}(X+1)$ -

954 Scaled Expression; where  $X$  is the normalized expression value of a given gene (see online  
955 Methods). (C) mRNA in-situ hybridization of barley *LGI* in the immature spike using the antisense  
956 (D) and sense probes (see online methods). Tissues represent cross-section through spikelet  
957 meristems in barley *cv.* Bonus at GP stages. (E–H) Proposed IM-to-BM boundary formation due  
958 to *Wt* gene function in non-Triticeae grasses (E). Lack of boundary formation due to the loss-of-  
959 function allele (F). Of note, involvement in the alteration of the boundary cell walls within *non-*  
960 Triticeae species cannot be excluded. (G) Proposed IM-to-SM boundary formation in *Wt* barley;  
961 restriction of *COM1* function to altering cell wall properties (the blue program), due to evolutionary  
962 functional differences. (H) Reversion to the previous identity state (IM) observed in barley *com1.a*  
963 due to lack of putative wall-amplified micromechanical signals needed to confer SM identity. For  
964 A-B as well as C-D; Source data are provided as a Source Data file.



Table 1. Functional variation of COM1 homologs observed among grass species.

| Species (Name)             | Gene function in boundary... | Effect on the corresponding organ/meristem |                            |                         |                                    |                               |
|----------------------------|------------------------------|--------------------------------------------|----------------------------|-------------------------|------------------------------------|-------------------------------|
|                            |                              | On branch formation                        | On pulvinus size/formation | Growth of palea cells   | Number of VB <sup>1</sup> in palea | Pollen fertility <sup>2</sup> |
| Barley (COM1)              | signaling                    | Inhibition                                 | absent <sup>3</sup>        | Inhibition <sup>4</sup> | Promotion                          | Normal                        |
| Brachypodium (BdWAB1/BAD1) | formation <sup>5</sup>       | No effect                                  | Promotion                  | No effect <sup>6</sup>  | Promotion                          | Normal                        |
| Rice (REP1)                | formation                    | Not reported <sup>7</sup>                  | Promotion                  | Promotion               | Promotion                          | Reduced                       |
| Sorghum (SbWAB1/BAD1)      | formation                    | Promotion                                  | Promotion                  | No effect               | Promotion                          | Reduced                       |
| Maize (WAB1/BAD1)          | formation                    | Promotion                                  | Promotion                  | Not reported            | Not reported                       | Not reported                  |

1 stands for Vasculature Bundles

2 revealed by grain setting measurements as a proxy

3 pulvinus is typically absent in Wt spike of Triticeae including barley as well as in the branched mutant spikes

4 apparent at the longitudinally-middle palea part resulting in the formation of the infolding

5 Refers to the formation of a boundary between pulvinus and the lateral branch without which fusion of the two happened; reflects intermediate evolutionary phylogenetic position of Brachypodium among grasses

6 not visible at the microscopic level

7 perhaps because the rice cultivars used in the corresponding studies (*cv. Nipponbare* and *cv. 9522*) are known to exhibit panicles with acute lateral branches.

965

966

967 Figure 1

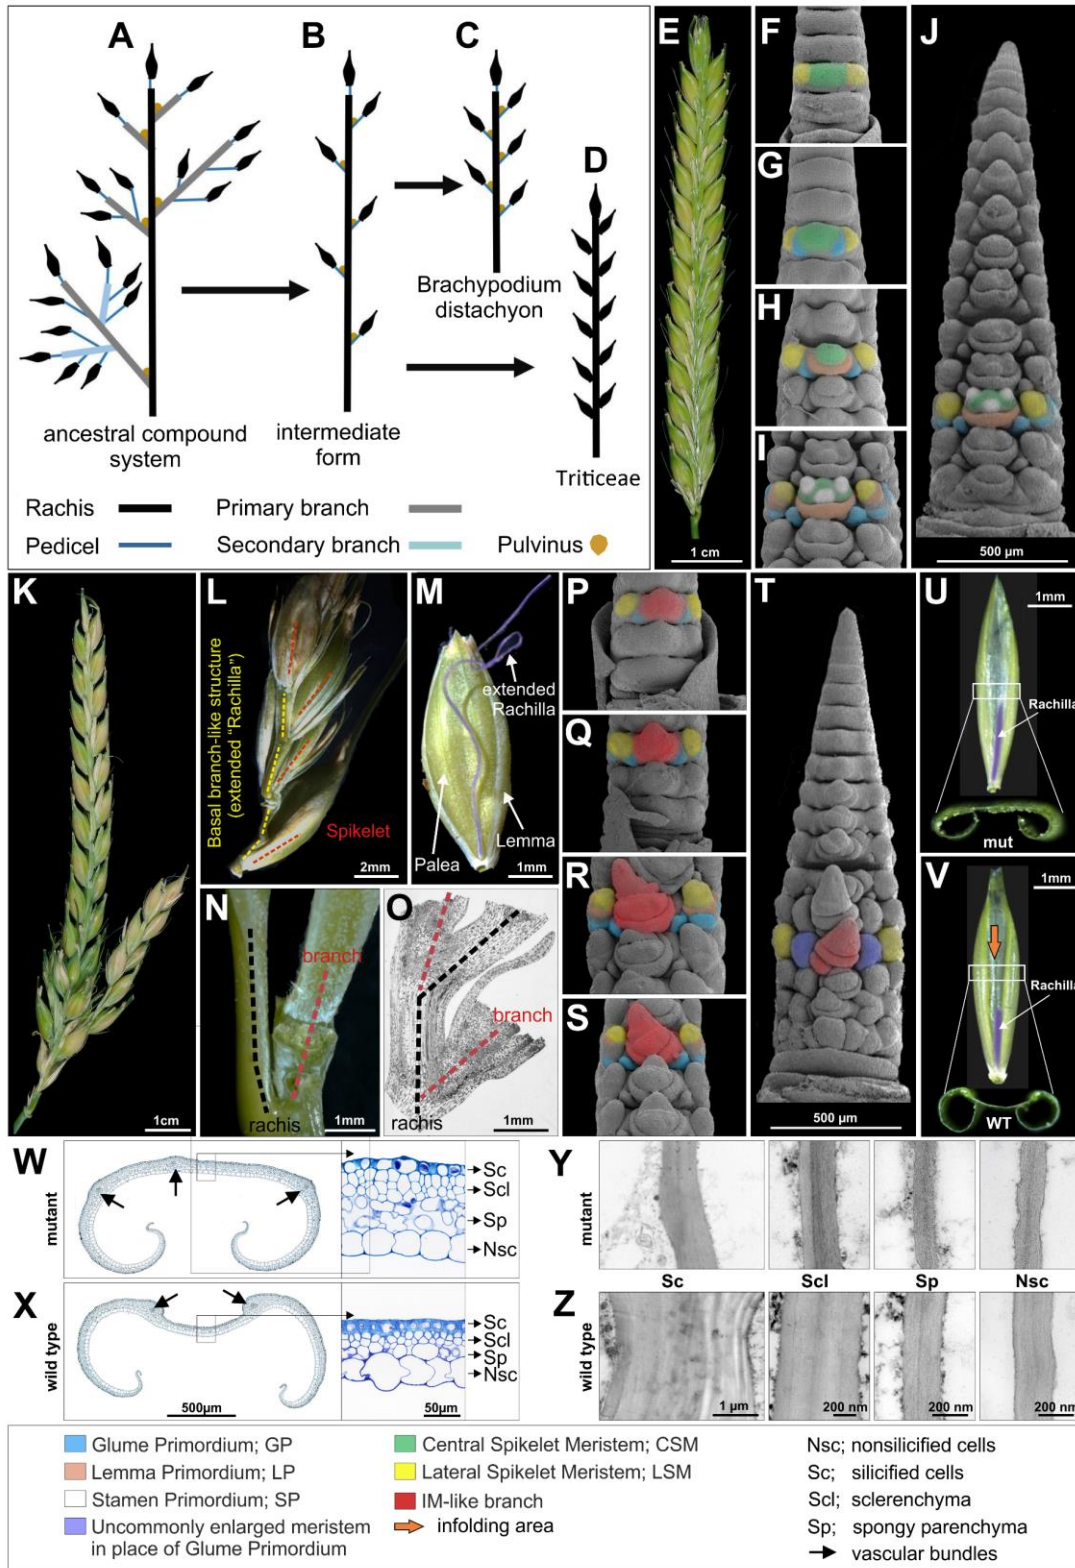

968

969

970 Figure 2

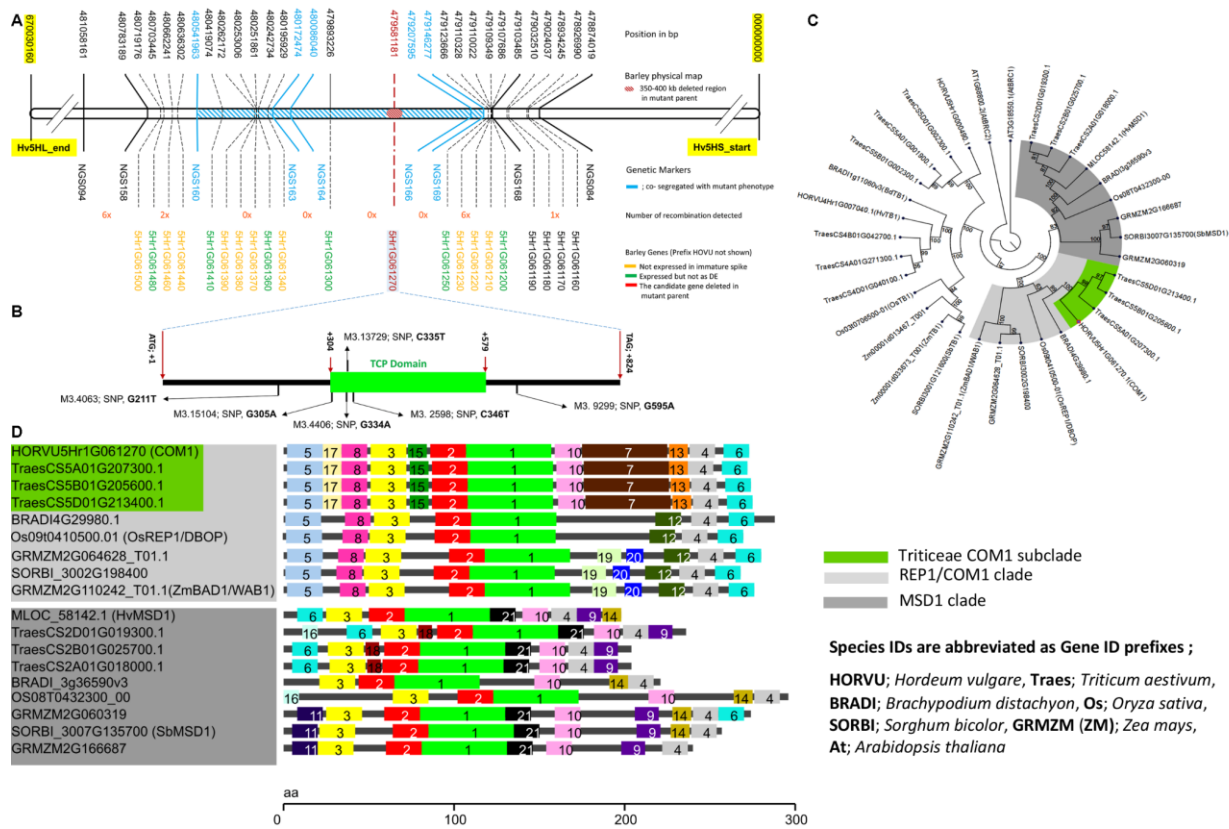

971

972

973 Figure 3

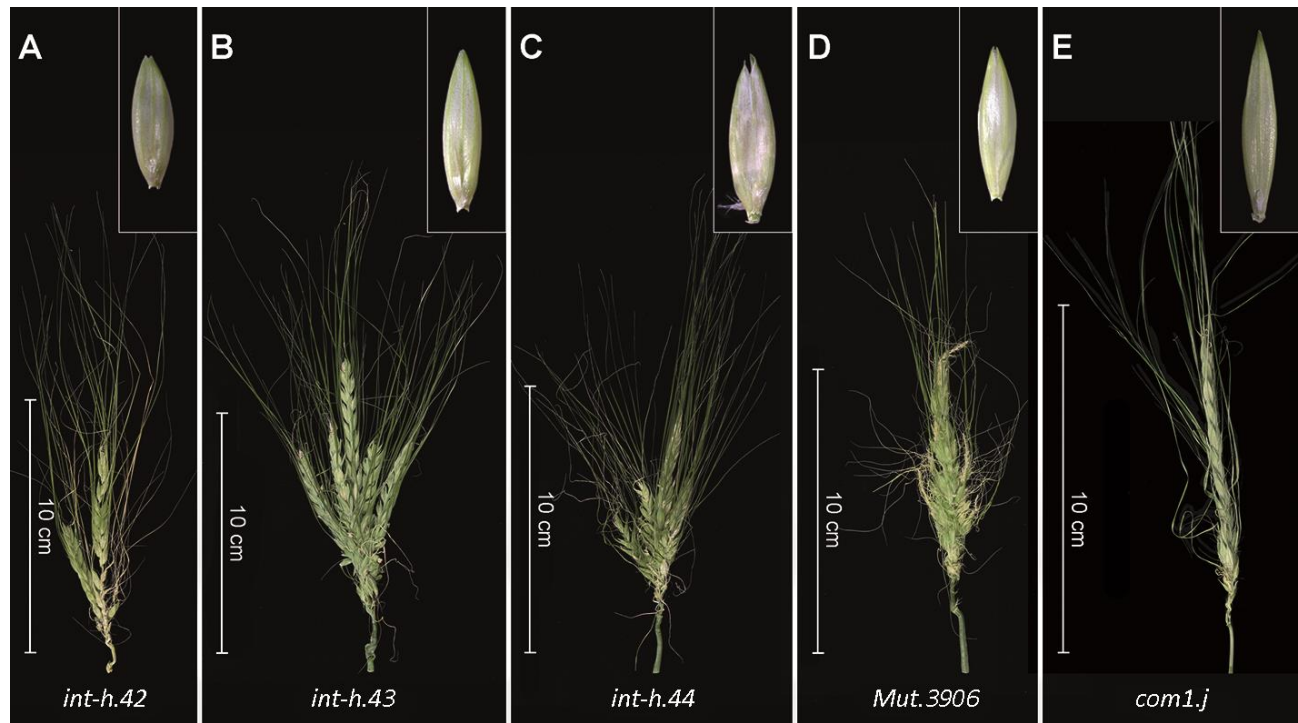

974

975

976 Figure 4

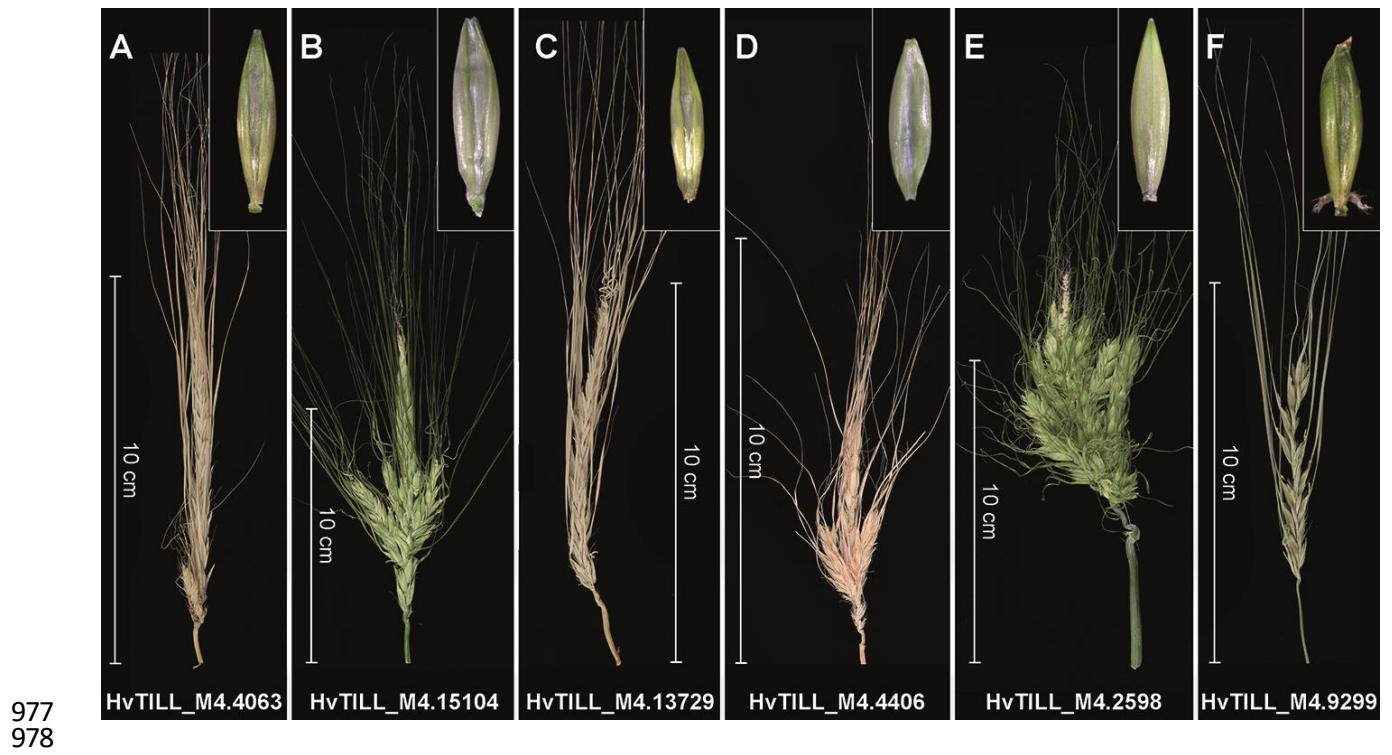

979 | Figure 5

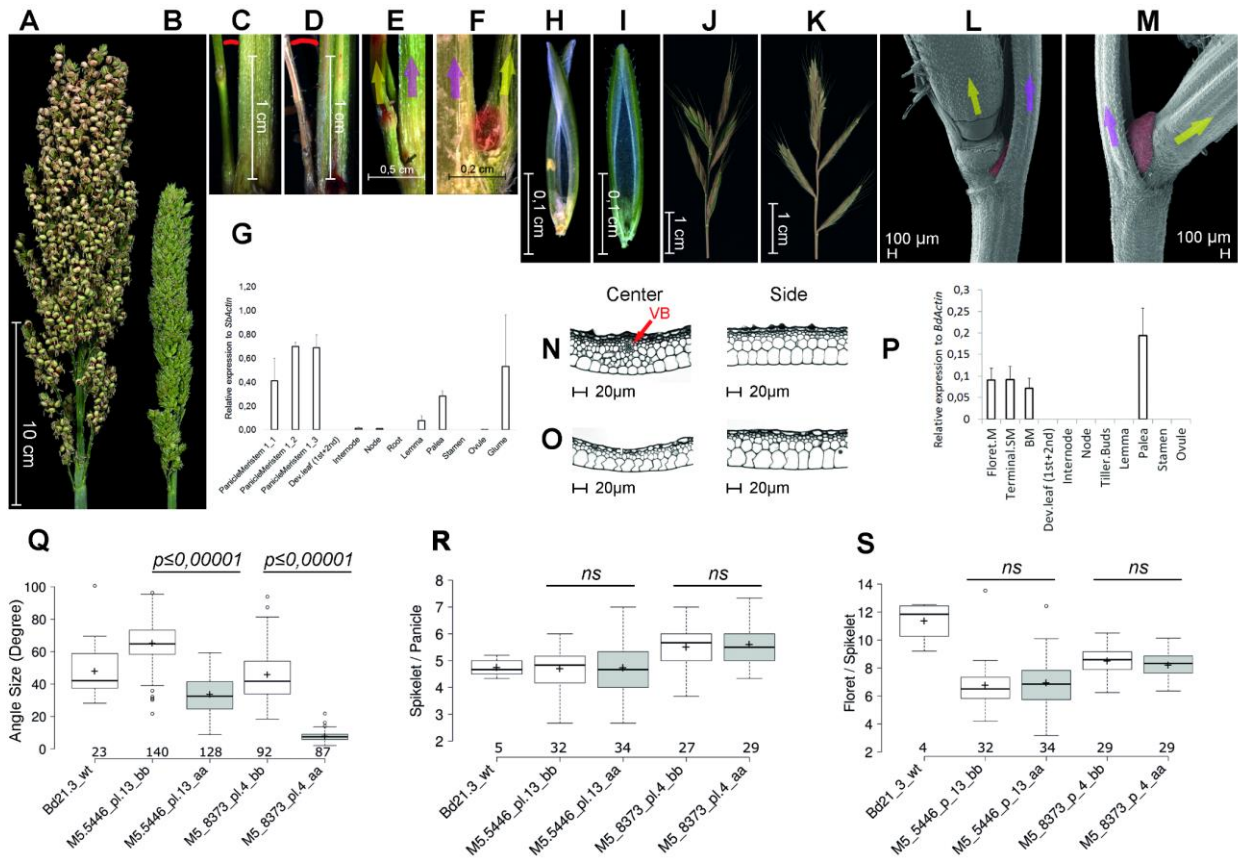

980

981

982 Figure 6

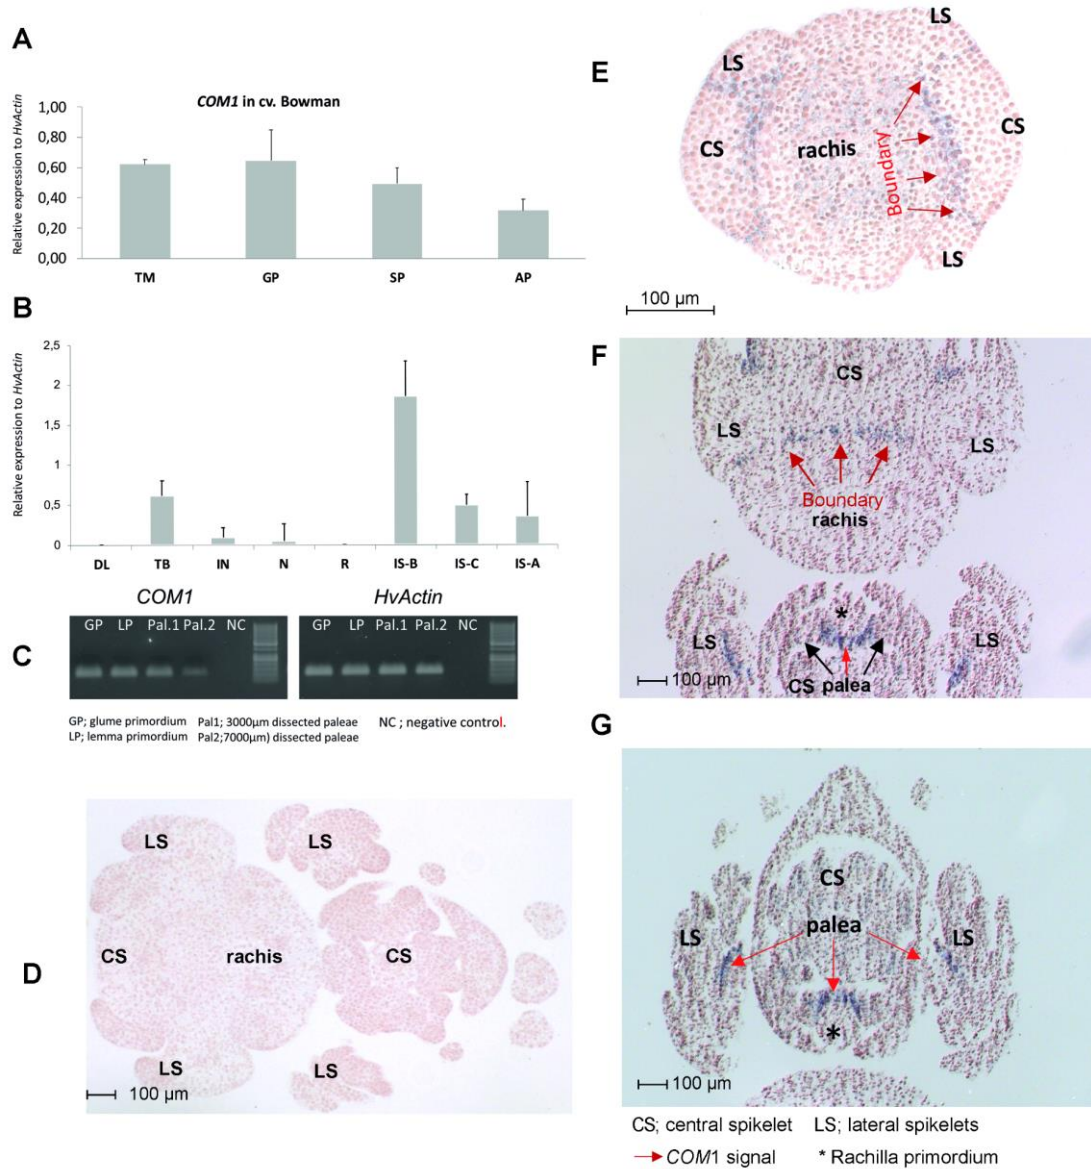

983

984

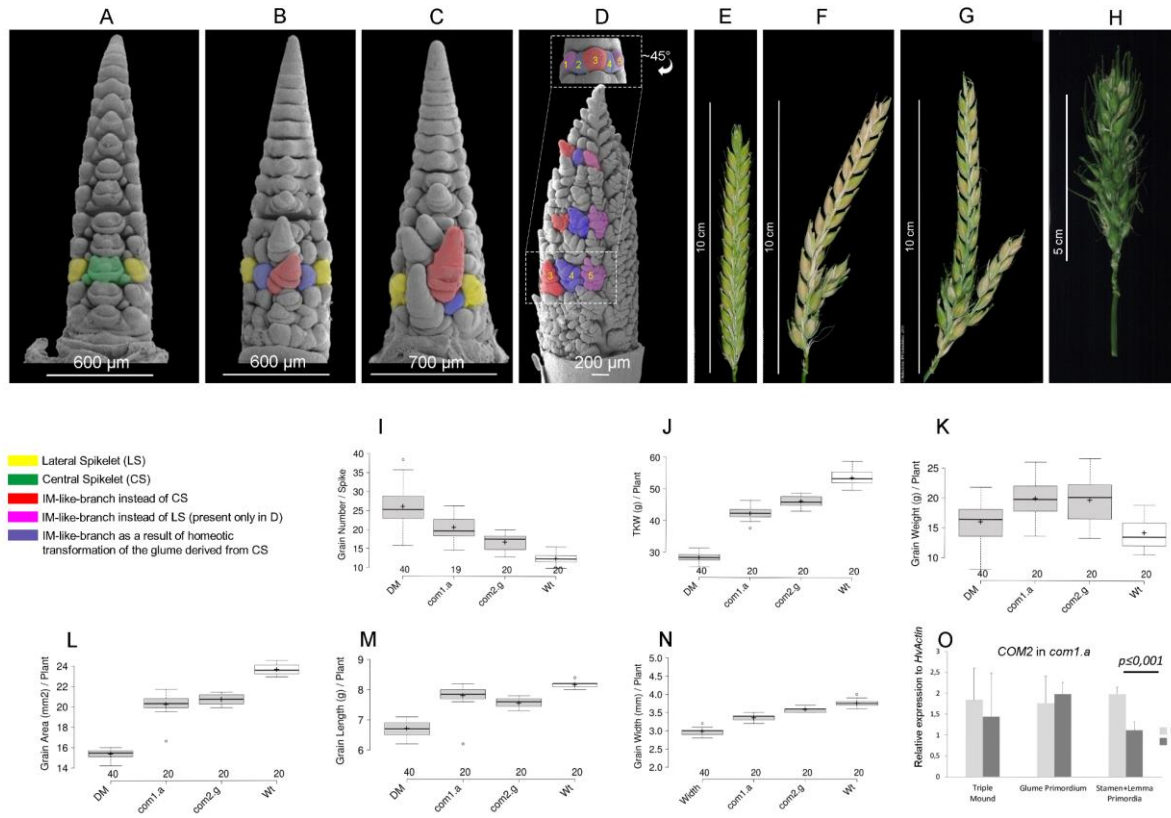

985

986 Figure 7

987

988



989 Figure 8

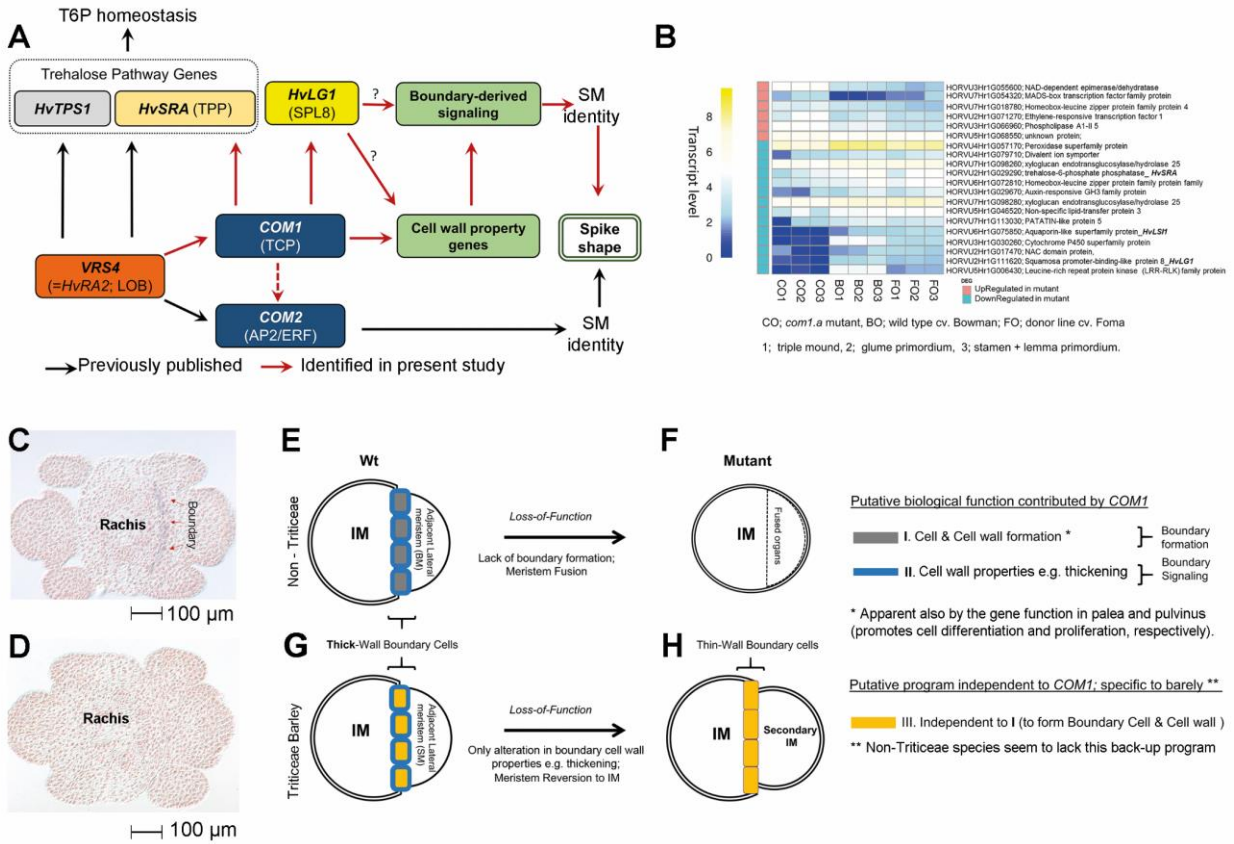

990
